# Supplementary material for: Prediction of discharge performance of hard carbon materials for high-performance sodium-ion batteries based on machine learning
Source: Royal Society of Chemistry journal article supplement (doi:10.1039/d5ta01528f), 2025-01-01
Supplement: d5ta01528f2.xlsx [file d5ta01528f2.xlsx]

## Sheet: Appendix C. Data set (filled in
Precursor	HTT (℃)	P	S	N	O	d002	La	Lc	n	ID/IG	D	VTotal	Lg(SSA)	Cyclic factor	Rate factor	ICE	Capacity	Working Plateau	-lg(DNa+)
waste cork	1200	0	0	0	1.14	3.97	78	12.5	3.15	2.47	9.94	0.014	0.965202	0.036156	0.26	71	240.7	0.37	9.05
waste cork	1400	0	0	0	0.73	3.92	86.6	13.6	3.47	2.22	9.01	0.011	0.932981	0.028795	0.36	76	296.3	0.36	9.14
waste cork	1600	0	0	0	0.24	3.76	101.7	14.5	3.86	1.89	11.72	0.015	0.74351	0.024776	0.45	81	274.8	0.33	8.88
Plant biomass	1050	0	0	0	10.5	3.76	24.89	8.04	2.14	2.1	2.85	0.33	2.66511	0.02065395789903621	0.1	69.7	35	0.23	9.61
Plant biomass	1050	0	0	0	12.5	3.86	19.41	10.1	2.62	1.79	83.94	0.034	0.20412	0.005029	0.12	72	184	0.31	8.06
the mixture of sucrose and phenol formaldehyde resin	1300	0	0	0	5.88	4.1	49.67	15.82	3.86	1.06	6.28	0.0063	0.60206	0.107294	0.1322183567447687	70	408	0.75	9.818388878165772
the mixture of sucrose and phenol formaldehyde resin	1300	0	0	0	1.22	4.1	50.93	16.12	3.93	0.79	5.35	0.0053	0.60206	0.057423	0.25887406447688666	85	310	0.27	9.597715284523463
glucose	1000	0	0	0	15.3	3.91	38.28	18.41	3.22	1	2.3	0.19	2.52994	0.000627	0.11	44	183.4	0.41	10.872282696620317
glucose	1300	0	0	0	9.8	3.85	46.01	20.02	3.4	1.08	2.9	0.024	1.53656	0.000649	0.45	80	312.1	0.36	9.49
glucose	1500	0	0	0	3	3.77	57.57	21.36	3.55	1.12	3.3	0.019	1.33445	0.000823	0.42	82	295.1	0.27	9.689975850697955
glucose	1000	0	0	0	9.8	3.88	57.43	20.78	3.32	1.05	2.2	0.048	1.92993	0.001285	0.26	60	163.1	0.33	10.527643321587878
glucose	1300	0	0	0	6.8	3.78	69.3	21.93	3.54	1.12	2.3	0.016	1.44716	0.00124	0.4	83	203.8	0.29	9.7
glucose	1500	0	0	0	4.3	3.57	20.99	29.58	4.17	1.39	2.3	0.014	1.35411	0.001001	0.37	75.9	158.1	0.23	9.731812944175887
rice husk	1100	0	0	0	10.92	4.03	45.34	11.6	2.89	1.52	5.28	0.0035	0.428135	0.018775	0.18	64	258	0.5	12.98
rice husk	1300	0	0	0	9.39	3.95	58.35	12.3	3.11	1.4	22.56	0.0018	-0.568636	0.061136	0.2	66	265	0.7	12.91
rice husk	1500	0	0	0	5.66	3.84	62.08	13.1	3.41	1.34	25.67	0.0015	-0.638272	0.018776	0.29	68	258	0.34	12.94
petroleum asphalt	1100	0	0	0	8.63	3.82	30.64	9.41	2.46	1.69	1.09	0.0275	2.00557	0.098787	0.44	80.8	126.5	0.35	10.146703597934987
petroleum asphalt	1100	0	0	0	15.61	3.89	26.43	8.87	2.28	1.94	1.18	0.1081	2.56578	0.125937	0.48	83.6	131.5	0.39	9.41
petroleum asphalt	1100	0	0	0	18.99	3.92	31.72	8.61	2.2	1.9	1.14	0.0926	2.51038	0.108247	0.5	82.8	156.4	0.4	10.021004573635729
petroleum asphalt	1100	0	0	0	0.18	3.49	39.93	19.56	5.6	1.37	0.74	0.0014	0.880814	0.100512	0.16	67.5	83.2	0.33	10.453829852249722
anthracite	1300	0	0	0	11.23	4.02	38.1	11.8	2.94	4.43	2.24	0.26	2.64345	0.000986	0.13	50.9	125.8	0.48	8.95
anthracite	700	0	0	0	6.75	3.85	46.5	15.8	4.1	3.09	2.89	0.06	1.90849	0.000163	0.39	82.3	254.6	0.26	9.13
anthracite	1300	0	0	0	5.36	3.69	54.1	17	4.61	2.64	15.68	0.008	0.176091	0.001124	0.29	78.6	182.2	0.26	9.24
sucrose and coal	1200	0	0	0	9.1	3.96	49.02	17.59	4.44	2.02	5.468	0.1103	1.90682	0.002645	0.35	61.1	103.1	0.41	10.89
platanus bark	700	0	0	0	9.63	3.94	16.2	7.6	1.93	0.84	4.37	0.658	2.7796	0.009694	0.19	34	236	0.87	12.35
platanus bark	700	0	0	0	14.14	3.79	33.9	8.85	2.34	0.78	2.15	0.165	2.48742	0.003442	0.09	40	91.1	0.35	12.37
buckwheat hulls	700	0	0	0	5.79	3.87	53.21	13.5	3.49	1.79	4.349	0.044	1.60724	0.001854	0.16	30	215.03	0.4	11.360598301534644
buckwheat hulls	900	0	0	0	4.67	3.84	71.15	14.6	3.8	1.75	4.454	0.037	1.52153	0.002217	0.55	35	285.8	0.33	11.287383544390998
buckwheat hulls	1100	0	0	0	4.14	3.83	71.08	15.9	4.15	1.64	5	0.035	1.44716	5.9e-05	0.26	53.4	366.28	0.3	8.56
buckwheat hulls	1300	0	0	0	3.97	3.74	83.24	16.8	4.49	1.59	5.507	0.027	1.31681	0.001824	0.19	41.3	241.72	0.27	11.048773709631432
paper towels	1400	0	0	0	5.85	3.97	70.59	10.21	2.57	1.29	0.793	0.00097	0.689309	0.04585	1.12	86.5	231.6	0.23	12.28
paper towels	1400	0	0	0	3.27	3.94	71.24	10.77	2.73	1.18	1.315	0.00215	0.815578	0.033725	1.54	92.05	225.45	0.28	11.99
paper towels	1400	0	0	0	3.81	3.54	73.18	18.69	5.28	1.03	0.206	0.00029	0.749736	0.125525	1.14	74.62	90.01	0.26	12.09
waste wood	1500	0	0	0	5.62	3.404	63.53	48.66	14.29	1.15	4.69	0.05579	1.67761	0.000212	0.14	63.9	202.64	0.31	9.66842229881575
waste wood	1500	0	0	0	5.28	3.784	53	13.46	3.56	1.17	2.24	0.00816	1.16435	0.000123	0.1	69.9	241.4	0.22	10.28182338973351
waste wood	1500	0	0	0	4.81	3.733	63.58	13.47	3.61	1.295	5.02	0.00326	0.414973	0.000128	0.32	71.1	383.65	0.32	9.993159627981683
biomass	1100	0	0	0	2.87	3.45	47.01349870708363	15.452479185272605	4.445402370076051	0.99	2.2	0.125	2.35793	0.000123	0.06	52	194.7	0.28	10.787393984104769
D-glucose	1000	0	0	0	5.9	4.1	13.9	12.1	2.95	0.88	1.39	0.175	2.58206	0.009104176459335875	0.06	62.68	160.7	0.42	8.8
D-glucose	1300	0	0	0	4	3.93	14.8	12.5	3.18	0.99	1.99	0.031	1	0.010863808921298302	0.29	84.17	188.4	0.28	8.91
D-glucose	1500	0	0	0	3.3	3.83	15.5	13.2	3.45	1.1	2.29	0.047	1.04139	2.8e-05	0.44	86.9	227.1	0.29	8.92
D-glucose	1700	0	0	0	2.3	3.63	21.7	14.1	3.88	1.13	3.87	0.023	0.845098	0.015585991522197886	0.32	79.26	118.5	0.1	8.9
D-glucose	1900	0	0	0	1.3	3.55	24.2	17.5	4.93	1.18	4.93	0.031	0.845098	0.016272412128526623	0.15	69.89	89.1	0.1	9.43
coal pitch	900	0	0	0	6.97	3.59	42	27.05	7.53	1.27	3.65	0.004	0.681241	0.001074	0.14	57.95	158	0.29391377903196647	10.321264328767198
coal pitch	900	0	0	0	6.31	3.51	42.05	27.17	7.74	1.23	0.77	0.001	0.591065	0.001914	0.13	57.95	83.6	0.24565103904144164	10.534575224857184
cotton roll	700	0	0	0	10.11	3.73	42.07	29.2	7.83	0.81	2.53	0.002	0.518514	5.3e-05	0.2	54.1	146.7	0.34	10.430038955051256
Bacterial cellulose	800	0	0	0	10.63	3.86	45.08	26.97	6.99	0.99	0.26	0.031	2.66745	1.5e-05	0.03	53.58	166.7	0.5	10.552129999549587
glucose	500	0	0	0	7.19	3.89	33.57	22.16	5.7	0.168	9.76	0.274	1.74935	0.000261	0.05	54.2	201.1	0.56	10.22087657197191
phenolic resin	800	0	0	0	10.53	3.92	44.56	20.65	5.27	0.951	32.21	0.0062	-0.113509	2.6e-05	0.04	66.22	131.8	0.46	9.45
citrate sodium	800	0	0	0	5.75	3.66	50.64	23.64	6.46	0.97	6.74	0.427	2.40312	0.00994	0.05	24.97	162	0.65	11.256685883531672
phenolic resin	700	0	0	0	3.99	4.02	58.06	21.18	5.27	0.84	7.36	1.806	2.99198	0.001031	0.09	17.6	222.61643714903363	0.6447006400566991	9.59
sucrose	1300	0	0	0	4.71	3.84	18	7.7	2.01	1.69	1.986	0.082	2.21643	0.002834	0.17	66	126.1	0.24	10.59
sucrose	1300	0	0	0	4.73	3.94	16.3	6.3	1.6	2.2	2.838	0.012	1.21748	0.002164	0.24	79	208.2	0.24	10.18
sucrose	1300	0	0	0	5.5	3.95	15.5	5.7	1.44	2.03	2.741	0.014	1.31387	0.00219	0.25	85	229.5	0.21	10.33
furfural	1100	0	0	0	3.9	3.87	66.47	18.9	4.88	1.1	2.66	0.011	1.22789	0.000178	0.15	72	283.4	0.21	10.003163580967628
Pistachio shells	900	0	0	0	5.03	3.86	47.5	8.1	2.1	2.2	1.8	0.266	2.77305	0.000492	0.07	29	67	0.44	12.54
Pistachio shells	1000	0	0	0	4.8	3.84	64.1	13.7	3.57	1.75	1.82	0.368	2.90741	0.000623	0.07	24	81.2	0.39	12.64
Pistachio shells	1200	0	0	0	3.18	3.84	66.7	16.7	4.35	1.58	2.14	0.273	2.70842	0.001081	0.07	38	125.6	0.35	13
Pistachio shells	1400	0	0	0	2.19	3.81	53.1	13.6	3.57	1.6	4.87	0.018	1.17609	0.000247	0.22	74	210.3	0.2	11.62
starch	1200	0	0	0	8.8	3.94	45.1	14.5	3.68	2.15	4.94	0.012	0.987666	3.6e-05	0.26	84.9	147.1	0.23	9.35
starch	1300	0	0	0	7.93	3.91	47.1	14.8	3.79	1.93	4.94	0.011	0.94939	1.8e-05	0.27	87.3	281.4	0.22	9.58
starch	1400	0	0	0	7.3	3.86	49.1	15.2	3.94	1.83	5.27	0.009	0.834421	0.020710763772666743	0.26	83.3	144.4	0.2	9.33
longan kernel	1300	0	0	0	13	3.9	15.5	4.3	1.1	1.79	3.45	0.021	1.39094	0.00023	0.08	79	345	0.32	6.4
Balsa wood	1200	0	0	0	4.12	3.81	67.27	18.68	4.9	1.11	6.75	0.014	0.913814	0.014315685361344463	0.07	64.7	254.4	0.2	9.63
Balsa wood	1400	0	0	0	3.65	3.8	65.15	16.96	4.46	1.15	9.3	0.019	0.901458	0.003781	0.06	64.2	287.4	0.16	10.23
Balsa wood	1600	0	0	0	3.31	3.75	82.05	19.78	5.27	1.23	11.49	0.024	0.921686	0.01623132225194706	0.07	60.3	262.8	0.18	8.88
basswood	1300	0	0	0	5.64	3.88	77	18.93	4.88	2.11	18.46	0.0104	0.352761	6.5e-05	0.08	92.6	279.5	0.22	6.98
pitch	800	0	0	0	16.3	3.87	33.9	11.5	2.97	2.04	6.65	0.226	2.13354	0.012261071267396673	0.11	59.9	186.8	0.37	9.62
pitch	1000	0	0	0	16.75	3.85	32.5	11.8	3.06	2.01	6.96	0.21	2.08171	0.011633544333797959	0.15	63.9	203.9	0.31	9.67
pitch	1200	0	0	0	10.92	3.86	37.3	12	3.11	1.96	13.06	0.016	0.690196	0.011500320678850609	0.18	67.1	227.7	0.25	9.71
pitch	1400	0	0	0	5.44	3.66	42.4	12.5	3.42	1.91	13.66	0.014	0.612784	0.017690100718854584	0.15	76.3	158.9	0.21	9.7
pitch	1600	0	0	0	5.32	3.43	62.2	52.1	15.19	1.89	9.76	0.01	0.612784	0.01738749086335306	0.19	72.7	197.2	0.17	9.69
pitch	2800	0	0	0	3.03	3.36	82.4	88.1	26.22	0.52	10	0.007	0.447158	0.02416874153553083	0.04	37	39.4	0.29	9.76
bamboo	900	0	0	0	10.52	3.92	11.65	7.55	1.93	2.25	1.63	0.212	2.71567	1.6e-05	0.31	68.2	165.9	0.37	10.22
bamboo	1100	0	0	0	8.1	3.87	12.55	7.98	2.06	2.22	3.7	0.033	1.55145	2e-05	0.04	72.7	303.8	0.3	9.69
bamboo	1300	0	0	0	7.86	3.85	11.88	8.52	2.21	2.2	5.22	0.017	1.11528	4.1e-05	0.12	84.1	326.8	0.19	9.91
bamboo	1500	0	0	0	2.56	3.71	18.06	9.83	2.65	2.04	18.06	0.017	0.575188	3.2e-05	0.24	85.6	300	0.11	9.71
bamboo	1700	0	0	0	2.42	3.7	17.01	10.27	2.78	1.97	15.18	0.014	0.567026	2.5e-05	0.31	87.6	310.2	0.11	9.84
corncobs	950	0	0	0	1.6	3.87	50.8	7.8	2.02	1	2.1	0.065	2.09482	0.000178	0.1	59.4	254	0.36	10.56
kapok fibers	1200	0	0	0	1.9	3.91	61.78	21.97	5.62	1.03	5.34	0.041	1.48855	0.006214	0.11	77	252.2	0.43	6.87
kapok fibers	1400	0	0	0	1.2	3.57	84.86	22.28	6.24	1.08	6.66	0.032	1.2833	0.001934	0.17	83	403.3	0.4	6.85
kapok fibers	1600	0	0	0	0.6	3.56	87.04	26	7.3	1.1	5.73	0.022	1.19033	0.001709	0.25	90	508	0.37	6.67
phenolic resin	1500	0	0	0	3.84	3.72	48	12.2	3.28	1.09	18.84	0.561	2.07555	0.002584	0.09	60	189.4	0.3	10.05624340290265
corn starch	900	0	0	0	5.98	3.8	34.3	7.9	2.08	0.92	1.64	0.2	2.68746	0.002213	0.15	77	219.5	0.38	10.161971499845118
corn starch	900	0	0	0	4.31	3.7	33.6	9.4	2.54	0.97	14.81	0.02	0.732394	0.002711	0.21	67	257.3	0.36	9.21
Sorghum stalk	1100	0	0	0	3.74	3.95	73.15	8	2.03	0.36	2.01	0.118	2.37014	0.02193652737231166	0.79	57.5	133.5	0.54	11.036762846422018
Sorghum stalk	1300	0	0	0	3.71	3.81	59.99	8.8	2.31	0.52	3.71	0.033	1.55084	0.015169888457197845	0.3	62.2	211.5	0.4	10.643088077338195
Sorghum stalk	1500	0	0	0	3.62	3.72	71.62	9.5	2.55	0.6	2.81	0.06	1.93222	0.022208470053197257	1.07	58.8	127.8	0.38	10.938539281767678
epoxy resins	1500	0	0	0	3.94	3.54	50.7	15	4.24	1.08	5.9	0.111	1.8757	0.006056	0.14	79.3	94	0.23	12.39
epoxy resins	1500	0	0	0	3.49	3.6	47.1	13.7	3.81	1.1	5.39	0.096	1.85199	0.004476	0.17	79	171	0.19	12.5
epoxy resins	1500	0	0	0	3.59	3.65	40.4	12.8	3.51	1.13	5.48	0.083	1.78412	0.004121	0.21	80.9	209	0.2	12.69
epoxy resins	1500	0	0	0	3.65	3.72	37.9	12.5	3.36	1.18	5.03	0.077	1.7864	0.004182	0.22	77.8	209	0.18	12.76
epoxy resins	1500	0	0	0	4.1	3.73	34.7	12.3	3.3	1.22	5.38	0.08	1.77379	0.00385	0.23	80.2	221	0.18	12.68
epoxy resins	1500	0	0	0	3.85	3.75	32.5	11.5	3.07	1.27	5.38	0.104	1.8866	0.003333	0.29	80.6	255	0.19	12.64
Bamboo	1100	0	0	0	3.11	4.62	28.8	20.5	4.44	1.3083605093527286	2.19	0.27	2.68664	0.000584	0.06583986006585107	58.7	301.9	0.93	10.131474891550923
d-glucose	1100	0	0	0	7.55	3.7	55.28	21.66	5.85	1.16	4.97	0.602	2.68476	0.004504	0.15	68.4	367.7	0.57	9.849172808090081
shaddock peel	500	0	0	0	14.14	3.52	44.43	11.92	3.39	2.22	1.82	0.221	2.68664	0.0246	0.17	44	157	0.6	11.016612833563606
shaddock peel	600	0	0	0	11.69	3.76	95.19	16.24	4.32	1.39	1.85	0.247	2.72916	0.019824	0.18	70	336.7	0.49	10.267354222769399
shaddock peel	700	0	0	0	9.28	3.71	72.44	15.41	4.15	1.89	1.25	0.136	2.63849	0.027564	0.13	65	161.2	0.53	10.601763612025593
commercial hard carbon	-	0	0	0	7.03	3.86	74.85	22.26	5.77	1.06	12.86	0.012	0.554368	0.000273	0.16	77	116.2	0.29	9.31
commercial hard carbon	450	0	0	0	22.61	3.96	73.51	21.36	5.39	1.08	3.55	0.023	1.41996	8e-05	0.25	68	288.1	0.41	9
rubberwood	900	0	0	0	14.36	3.89	58.19	18.76	4.82	0.85	1.74	0.122	2.44789	9.8e-05	0.1	53.9	210.5	0.18	12.71
rubberwood	1000	0	0	0	12.32	3.86	59.01	19.08	4.94	0.78	1.77	0.122	2.43968	0.000172	0.1	50.973569526493016	239.3	0.48645091068326707	13.12
rubberwood	1200	0	0	0	11.48	3.75	67.55	19.12	5.1	0.74	3.49	0.028	1.5061	0.000157	0.11	71.3	388.6	0.21	11.61
rubberwood	1400	0	0	0	9.15	3.4	67.97	21.54	6.34	0.77	6.02	0.019	1.10106	0.000165	0.1	70.3056804941186	365.4	0.38990540627148984	11.88
bituminous coal	1300	0	0	0	4.64	3.97	75.15	11.2	2.82	1.58	6.2	0.082	1.72411	0.030589	0.12	49.5	135.8	0.32715046955910715	10.27
bituminous coal	1300	0	0	0	11.62	3.79	72.47	21.51	5.67	1.18	13.36	0.073	1.34064	0.010433	0.23	64.2	259.5	0.24	9.45
PET-based plastic waste	1000	0	0	0	16.86	3.79	77.67	18.47	4.87	1.34	3.63	0.186	2.31175	5.5e-05	0.35	66	271.5	0.16	8.79
commercial hard carbon	-	0	0	0	3.79	3.85	64.66	19.4	5.04	1.12	2.56	0.0302	1.67403	2.1e-05	0.15	88.3	293.2	0.24	10.75
commercial hard carbon	800	0	0	0	2.57	3.92	59.5	21.92	5.59	1.39	5.53	0.0271	1.29226	5e-06	0.05	90.8	303.9	0.24	10.33
commercial hard carbon	1000	0	0	0	2.29	3.95	52.7	20.44	5.17	1.49	4.23	0.0122	1.06221	7e-06	0.05	91.2	314.6	0.22	10.41
commercial hard carbon	1200	0	0	0	1.88	3.88	70.46	21.45	5.53	1.15	5.27	0.0114	0.937016	6e-06	0.05	92	327.2	0.21	10.36
Peanut shell	1000	0	0	0	6.26	3.73	59.49	15.78	4.23	0.91	3.64	0.032	1.54974	0.055278	0.16	53.3	171.3	0.31	10.9
sugarcane bagasse	1000	0	0	0	4.57	3.55	89.26	20.16	5.68	0.81	4.98	0.109	1.94082	0.081133	0.09	27.3	81.5	0.42	11.03
glucose	1400	0	0	0	4.71	3.78	40.95	10.6	2.8	1.01	1.97	0.086	2.19415	0.076725	1.15	77.7	128	0.22	11.3
pitch	1400	0	0	0	8.8	3.85	110.81	22.6	5.87	1.08	6.97	0.1595	1.98985	0.032167	0.2	63.5	228.5	0.42	10.96
pitch	1400	0	0	0	5.8	3.85	109.62	22.96	5.96	1.13	7.18	0.084	1.7014	0.001478	0.27	77.6	285.8	0.29	10.44
pitch	1400	0	0	0	5.7	3.87	108.53	22.74	5.91	1.1	7.67	0.0713	1.61752	0.005644	0.3	75.9	318.1	0.25	10.47
pitch	1400	0	0	0	7.3	3.85	108.06	22.37	5.81	1.06	4.86	0.0932	1.93394	0.0142	0.23	71.3	243.6	0.28	10.72
vinasse	1100	0	0	0	5.67	3.67	33	15	4.09	1.05	2.2	0.26	2.67548	0.003242	0.1	30	138.5	0.43	11.416904831761656
vinasse	900	0	0	0	5.08	3.7	30	15	4.05	0.93	4.59	0.02	1.24105	0.002754	0.15	53.7	207.7	0.34	10.555444446466245
vinasse	1100	0	0	0	4.55	3.86	27	14	3.63	0.98	7.65	0.02	1.01953	0.001073	0.31	61.1	311	0.36	9.36
vinasse	1300	0	0	0	3.87	3.73	28	16	4.29	1.07	3.63	0.04	1.64365	0.000591	0.25	56	284.8	0.35	10.379710614716736
asphalt	1300	0	0	0	3.01	3.66	59.29	9.16	2.5	1.1	15.05	0.004	0.00432137	0.000139	0.33	62.29	159.6	0.3	10.306859201166075
acetylated pine	1300	0	0	0	12.33	3.98	48.7	12.3	3.09	1.81	2.09	0.126	2.3822	0.004923	0.15	54.8	205.9	0.37	10.73
corn cob	1300	0	0	0	11.31	3.96	43.7	12.3	3.11	1.47	2.06	0.101	2.29203	0.00433	0.14	61.5	279.2	0.27	10.52
pine	1300	0	0	0	8.19	3.9	43.6	13.5	3.46	1.76	2.7	0.145	2.33203	0.004612	0.16	60.1	258.3	0.3	10.66
Polycarbonate	1200	0	0	0	7.75	3.77	33.36	12.69	3.37	1.56	8.69	0.004	0.267172	0.001455	0.32	80.6	130.8	0.19	9.21
Polycarbonate	1400	0	0	0	7.34	3.75	39.28	13.47	3.59	1.46	8.05	0.004	0.247973	0.003202	0.25	84.6	229.9	0.17	9.04
Polycarbonate	1600	0	0	0	6.52	3.72	45.56	13.69	3.68	1.35	12.56	0.006	0.276462	0.005431	0.47	84.3	134	0.15	9.17
Polyethylene terephthalate	1200	0	0	0	12.16	3.81	37.58	12.1	3.18	1.42	6.29	0.002	0	0.003049	0.21	80.8	218.5	0.21	9.11
Polyethylene terephthalate	1400	0	0	0	8.02	3.8	40.35	13.78	3.63	1.35	7.65	0.002	0	0.001835	0.57	86.1	202.9	0.17	9.05
Polyethylene terephthalate	1600	0	0	0	7.3	3.63	44.9	14.21	3.92	1.01	7.37	0.005	0.424882	0.00372	0.22	83.2	227.3	0.14	9.19
Artemia cyst shells	1300	0	0	0	6	3.77	66.7	20.76	5.51	1.03	8.7	0.00945	0.462398	0.004758	0.18	76	181.6	0.28	9.12
resol	800	0	0	0	7.5	3.7	37.31	13.8	3.73	1.06	7.28	1.4	2.88593	0.013543389135942142	0.14	14.8	47.1	0.58	10.8
resol	800	0	0	0	8.3	4	37.3	13.4	3.35	1.88	5.78	1.14	2.89708	0.012078350139186268	0.12	17.1	78.2	0.64	10.39
resol	800	0	0	0	8.1	4	36.85	13.4	3.35	1.08	6.74	0.89	2.72263	0.012475387696410576	0.18	38.2	127.2	0.61	12.66
potassium gluconate	850	0	0	0	9.14	4.07	41.74	14.91	3.66	0.94	2.981	0.766	2.9645	4.7e-05	0.1	66.3	301.8	0.5037880023240248	6.81
Microcrystalline cellulose	1000	0	0	0	12.1	3.93	33.1	11.1	2.82	1.01	4.44	0.04	1.5563	1e-06	0.07	34.3	108.9	0.47	11.327717274232036
Microcrystalline cellulose	1000	0	0	0	19.3	3.5	40.6	16.2	4.63	0.83	7.5	0.18	1.98227	1e-06	0.13	37.9	207.1	0.78	10.861323596008631
Microcrystalline cellulose	1000	0	0	0	3.9	3.62	37.1	12	3.31	0.94	6.18	0.32	2.31597	2e-06	0.05	21.5	79.9	0.59	11.70049180265176
Borassus flabellifer male inflorescences	1400	0	0	0	17.62	3.55	35.3	10.1	2.85	1.35	5.24	0.005	0.61066	0.0865	0.2	76.4	375	0.29	9.726804891015178
Borassus flabellifer male inflorescences	1400	0	0	0	5.47	3.6	52.1	14.1	3.92	0.77	5.31	0.009	1.27577	0.038225	0.26	86.6	413	0.18	9.429011543521625
Borassus flabellifer male inflorescences	1400	0	0	0	6.34	3.58	48.4	11.2	3.13	1.03	5.28	0.007	0.947434	0.0649	0.24	83.4	405	0.45	9.57440605354188
Epoxy phenol novolac resin	1400	0	0	0	7.21	3.89	18.61	17.89	4.6	1.44	8.62	0.0073	0.52763	3.9e-05	0.08	82.6	382.9	0.31	11.4
Epoxy phenol novolac resin	1600	0	0	0	6.06	3.82	26.17	18.38	4.81	1.34	8.17	0.0054	0.418301	2.2e-05	0.07	83.8	424.9	0.22	11.24
Epoxy phenol novolac resin	1800	0	0	0	2.87	3.64	54.38	23.76	6.53	1.22	7.43	0.0027	0.155336	1.4e-05	0.08	84.6	465.1	0.24	11.22
lignin	1400	0	0	0	8.79	3.87	22.69	12.33	3.19	1.13	9.08	0.0019	-0.0705811	0.016156	0.32	78.09	213.1	0.22	12.08
Artemia cyst shells	1300	0	0	0.8	13.5	3.79	57.65	19.55	5.16	1.17	6	0.197	2.45606	0.004748	0.22	68.4	253.1	0.3	8.85
Artemia cyst shells	1300	0	0	2.1	7.3	3.71	66.75	19.6	5.28	1.05	10.8	0.0145	0.838849	0.004896	0.22	71.7	240.6	0.27	9.01
rosewood	1300	0	0	1.1	6.44	3.87	74.72	17.69	4.57	2.45	17.21	0.0131	0.483502	6.3e-05	0.07	89.8	307.9	0.28	6.95
poplar wood	1300	0	0	1.25	7.67	3.85	59.91	19.75	5.13	2.32	19.26	0.0215	0.64987	0.000243	0.07	86.1	321.9	0.23	6.93
azobe wood	1300	0	0	0.13	5.97	3.87	69.4	19.73	5.1	2.52	19.25	0.0124	0.410963	5.4e-05	0.08	71.8	319.9	0.25	6.97
fir wood	1300	0	0	0.37	6.65	3.81	73	19.37	5.08	1.74	17.4	0.0134	0.488635	6.8e-05	0.07	87.4	297.9	0.22	6.95
moso bamboo	1300	0	0	2.51	8.58	3.82	80.69	19.94	5.22	1.96	12.21	0.0029	-0.0223221	0.000365	0.08	87.3	331.4	0.22	6.92
Fir wood	1300	0	0	0.08	0.61	3.83	39.7	11.3	2.95	1.39	6.83	0.369	2.33445	0.013856	0.24	72.4	249.5	0.28	13.13
Fir wood	1300	0	0	0.17	0.5	3.86	33.8	11	2.85	1.61	3.51	0.034	1.58883	0.017364	0.12	66.6	241.8	0.34	13.08
Fir wood	1300	0	0	0.29	1.01	4.03	34.4	11	2.73	1.59	8.08	0.021	1.01703	0.017436	0.2	71.2	228.4	0.3	13.11
Fir wood	1300	0	0	0.15	0	3.77	35.3	11.1	2.94	1.52	7.59	0.045	1.37475	0.014776	0.14	66.4	201.9	0.24	13.05
Fir wood	1100	0	0	0.25	0.39	3.83	30.7	10.3	2.69	1.61	8.02	0.086	1.63246	0.018756	0.19	68.9	189.1	0.18	10.159663929219873
Fir wood	800	0	0	0.49	2.47	3.91	29.5	9.2	2.35	1.82	3.61	0.032	1.55023	0.022792	0.16	55.7	183.4	0.36	10.706085433571914
cornstarch	biological fermentation	0	0	0.5	2.98	3.86	28.43	11.82	3.06	1.76	1.75	0.037	1.62232	0.000262	0.4	83.6	386	0.37	9.618254701997362
cornstarch	biological fermentation	0	0	0.62	5.51	4.01	61.55	21.91	5.46	1.81	9.382232473592204	-0.045196	0.910091	0.00021	0.03	87.2	311	0.37	9.29106484047495
potato starch	biological fermentation	0	0	0.65	5.54	3.95	51.04702639391636	17.02872028345856	4.333368299405716	1.84	1.81	0.007	1.30814	0.000241	0.19	71.67670584632288	300	0.45	10.067263514825061
carboxymethyl cellulose sodium	900	0	0	4.95	5.29	3.64	38	21	5.77	1.1	2.27	0.27	2.69108	1.9e-05	0.03	51.16	150.4	0.81	12.26
carboxymethyl cellulose sodium	1050	0	0	2.35	5.65	3.88	15.6	14	3.61	1.05	2.74	0.26	2.5977	2.2e-05	0.02	79.52	273.3	0.54	11.85
carboxymethyl cellulose sodium	1200	0	0	1.84	4.92	3.77	31.5	15.5	4.11	0.98	2.61	0.23	2.53275	5e-05	0.02	65.4	167.1	0.78	11.92
resorcinol-formaldehyde resin	800	0	0	2.5	12.29	3.73	37.42	10.06	2.7	1.02	2.3	0.41	2.85168	2.3e-05	0.04	97	239.5	0.42066072861923764	10.01
resorcinol-formaldehyde resin	800	0	0	3.05	6.01	3.81	38.06	8.14	2.14	0.99	4.2	0.962	2.96607	3.5e-05	0.07	65	288.4	0.5352562993762542	10.17
resorcinol-formaldehyde resin	800	0	0	3.64	6.14	3.8	31.11	9.86	2.59	0.98	5.1	0.873	2.83459	3.1e-05	0.11	88	324.2	0.488445685274028	9.97
resorcinol-formaldehyde resin	800	0	0	2.95	6.57	3.65	22.88	8.61	2.36	0.99	6.1	2.002	3.1152	3.9e-05	0.07	75	358.5	0.77	9.85
resorcinol-formaldehyde resin	800	0	0	1.74	13.53	3.69	37.95	8.14	2.21	0.97	7.6	0.955	2.70289	4.1e-05	0.04	62	311.9	0.5817016379553985	9.98
resorcinol-formaldehyde resin	800	0	0	7.01	6.9	3.36	28.74	9.78	2.91	0.99	7.7	1.593	2.91759	3e-05	0.12	84	293.1	0.5820672388467211	9.95
Polyaniline	800	0	0	0.71	6.05	3.5	37.45	14.06	4.02	1.3844587838841713	33.73	0.156	1.26717	0.012338634205761704	0.13617694930446428	36.6	148.15727859480282	0.42	10.147632141804557
Polyaniline	1000	0	0	0.82	7.94	3.55	35.28	13.69	3.86	1.3946341734836736	28.76	0.151	1.32222	0.006284	0.14617366691574757	47.8	184.2584637197978	0.55	9.945161536827964
Polyaniline	1150	0	0	0.74	7.59	3.66	51.53	14.71	4.02	1.3376329143880619	23.66	0.139	1.37107	0.003816	0.5	51.6	254.1	0.4	14.52
phenol/formaldehyde	800	0	0	1.46	13.33	3.48	50.51	10.2	2.93	0.94	10.2	1.694	2.82217	0.004267	0.2	33	270.4	0.74	11.025067337685513
phenol/formaldehyde	800	0	0	2.24	15.16	3.81	41.64	11.14	2.92	1.04	17.66	1.678	2.57978	0.006445	0.1	31.8	188.2	0.672957652879402	10.850038856448553
waste cork	800	0	0	0.05	2.33	4.03	67	12.8	3.18	2.87	5.44	0.013	1.06707	0.049033	0.13	62	293.5	0.62	9.01
dopamine hydrochloride	600	0	0	10.4	11.8	4	38.7	8.19	2.05	0.84	20.41	0.305	1.77597	0.000167	0.12	89.4	448.7	0.8	8.869830899590742
resorcinol	1000	0	0	1.94	7.32	4	59.5	15.65	3.91	1.03	0.52	0.362	2.88195	0.002568	0.13	71	294	0.39	7.07
lignite coal and sucrose	1200	0	0	0.51	4.29	3.45	60.61	21.78	6.31	1.59	5.585	0.2367	2.22922	0.001566	0.34	59.9	179.1	0.36	10
lignite coal and sucrose	1200	0	0	0.64	4.71	3.88	33.74	14.06	3.62	1.9	13.49	0.0084	0.396199	0.002418	0.39	80	119.1	0.36	9.675722650836258
lignite coal and sucrose	1200	0	0	0.67	4.44	3.82	33.77	14.23	3.73	1.87	17.615	0.0048	0.0374265	0.003899	0.42	81.8	184.3	0.29	9.285539880125743
lignite coal and sucrose	1200	0	0	0.73	3.67	3.77	33.75	13.06	3.46	1.85	14.32	0.0053	0.170262	0.003395	0.5	82.9	257.6	0.39	9.385867166339626
lignite coal and sucrose	1200	0	0	0.76	3.04	3.61	43.52	14.53	4.02	1.63	10.22	0.013	0.692847	0.001048	0.26	76.4	255.3	0.36	9.735373236179484
amino acids	700	0	0	1.64	7.73	3.7	27.7	11.43	3.09	1.02	2.29	0.0921	2.20737	0.005597	0.12	55.2	229.6	0.27	10.627149717494795
amino acids	800	0	0	1.73	4.69	3.9	26.68	12.62	3.24	1.03	6.63	0.2954	2.27807	0.005386	0.11	51.3	381.8	0.38	10.337028218813444
amino acids	900	0	0	1.81	9.14	4.1	32.67	12.32	3	1.05	2.53	0.1224	2.28511	0.005621	0.11	53.8	260.8	0.26	10.612645039633168
Artemia cyst shell	850	0	0	1.3	18.5	3.37	47.47525039106203	14.980895861680057	4.359565647848631	0.85	5.45	2.03	3.17319	0.004624	0.17	38	325	0.69	10.823150342607677
glycine	790	0	0	8.45	5.76	4.4	47.23	18.07	4.11	0.99	2.44	0.44	2.85854	0.008828	0.14	51.15	255	0.87	10.702272190945846
glycine	790	0	0	7.49	5.87	3.7	41.26	14.24	3.85	0.79	2.52	0.17	2.43136	0.004472	0.11	38.37	105.6	0.59	11.330888449512015
polyacrylonitrile	700	0	0	13.48	3.26	3.46	33.21	14.16	4.09	0.9	5.46	0.015	1.15442	0.004959	0.09	41.6	122.7	0.35	11.123896016548203
1,3,5-triformylphloroglucinol	500	0	0	11.5	6.175596406341732	3.94	35.56	18.09	4.59	0.918	6.05	0.11	2.58047	0.00518	0.17787372996657472	53	224.2289874333557	0.5589684972045067	10.526663925822302
1,3,6-triformylphloroglucinol	600	0	0	9.75	6.453202396243151	4	35.16	17.1	4.28	0.923	5.55	0.1	2.68314	0.005058	0.06	49.45	229.7	0.5	10.643142651193328
1,3,7-triformylphloroglucinol	700	0	0	8.38	6.5393355912784195	3.9	39.15	17.18	4.41	0.934	5.52	0.1	2.62818	0.005187	0.1824378414695802	49.11	205.23740744447764	0.5300752414230935	10.69903840901924
polyacrylonitrile	650	0	0	14.88	3.65	3.7	45.71	17.39	4.7	1.04	7.11	0.0102	0.758912	0.005514	0.05	46.57	135.3	0.64	10.906244368239022
Pristine Jute fibers	700	0	0	5.1	13.94	3.69	38.21	16.37	4.44	0.997	8.790942475210727	0.37074197671630815	2.11906	0.003106	0.06	45.6	201.4	0.48	10.647390561396952
Pristine Jute fibers	700	0	0	0.96	9.58	3.82	39.31	17.92	4.69	0.944	2.88	0.198	2.43824	0.005902	0.15856045656867598	43.8	182.3	0.43	10.897771202135678
Pristine Jute fibers	700	0	0	4.18	14.25	3.67	39.73	18.99	5.17	0.902	12.87	0.005	0.220108	0.005852	0.12	50.3	197.5	0.48	10.324219521252463
gelatin	800	0	0	8.57	6.201528718333155	3.5	56.84	20.63	5.89	1.12	5.53	1.03	2.87576	0.008438	0.13	22.4	193.3	0.65	11.475389245341747
water hyacinths	700	0	0	2.26	7.63	4.2	64.33	15.55	3.7	1.05	2.71	0.68	3.00234	0.026576	0.14	47.74	243.2	0.53	10.897862232377875
water hyacinths	900	0	0	1.25	6.5	4	59.61	14.27	3.57	1	2.48	0.48	2.88891	0.029844	0.13	51.99596014255205	194.8	0.470069167390619	10.861712948427625
water hyacinths	1100	0	0	0.27	4.7	3.7	57.82	15.96	4.31	0.91	2.66	0.41	2.79014	0.027052	0.13	52.40570624847628	170.7	0.4253332931132625	10.83319528788307
zeolitic imidazolate framework	1000	0	0	2.88	3.29	3.8	106.78	60.86	16.02	0.88	10.11	0.5469	2.33507	7.3e-05	0.19	77.1	239.3	0.53	9.03054068104771
zeolitic imidazolate framework	950	0	0	2.35	4.16	3.83	88.17	36.82	9.61	1.16	9.14	0.4671	2.31033	0.000234	0.35	98	300.9	0.59	8.826042652442585
ZIF-8	900	0	0	3.9	11.3	3.53	60.61	11.36	3.22	1.2	0.4	0.14	3.14947	0.023184	0.11	68.28	118.9	0.64	10.06
ZIF-8	800	0	0	9.7	6.3	3.72	59.7	11	2.96	1.22	3.39	0.42	2.69513	0.018008	0.08	60.04	222.5	0.5295375182913333	9.25
ZIF-8	900	0	0	5.2	4.1	3.61	63.75	11.27	3.12	1.15	3.21	0.49	2.78547	0.017396	0.1	60.6	229.3	0.45	8.83
ZIF-8	1000	0	0	1	14.2	3.59	64.73	11.2	3.12	1.05	2.54	0.6	2.97525	0.015512	0.03	59.3	179.2	0.5017103471067351	10.03
anthracite	1000	0	0	5	7.76	3.71	49.64	23.52	6.34	1.19	2.06	0.034	0.737193	2.2e-05	0.04	64.7	212.6	0.33	11.92
anthracite	1200	0	0	2.23	6.81	3.94	45.04	25.59	6.49	1.09	2.58	0.04	0.849419	1.7e-05	0.04	74.2	367.6	0.31	11.35
anthracite	1400	0	0	1.12	5.22	3.73	63.61	29.99	8.04	0.96	2.57	0.036	0.835056	2e-05	0.33	77.5	258.2	0.25	11.68
Sorghum	1000	0	0	1.62	13.45	4.08	53.39	37.76	9.25	0.9	7.98	0.033	2.1357	0.01532214137884626	0.1	85.8	261.4	0.49	9.033712968377639
Sorghum	1200	0	0	1.65	16.68	3.75	54.29	30.47	8.13	0.98	6.87	0.037	1.98421	4.3e-05	0.15	91	320.6	0.51	4.37
Sorghum	1400	0	0	1.33	15.13	3.45	75.56	33.75	9.78	0.86	6.04	0.058	2.28852	0.02363783374449006	0.06	80.2	179.2	0.37	9.567903622499776
Sorghum	1600	0	0	1.24	13.46	3.38	85.94	39.37	11.65	0.69	5.63	0.059	2.34201	0.025366887633570926	0.09	80	178.3	0.37	9.520406876057372
citric acid	800	0	0	15.17	4.59	3.36	39.84	26.31	7.83	0.97	10.84	0.237	1.94201	0.006746	0.09	33.2	175.1	0.61	10.62
Mango-peels	1000	0	0	1.3	10.31	3.8	55.68	25.67	6.76	0.63	8.63	2.331	3.03338	0.006706	0.51	40.1	280	0.42	11.14
Polydopamine	800	0	0	5.71	6.41	3.9	46.74	23.9	6.13	0.97	6.7	0.31	2.26717	0.007753	0.09	31.3	220.3	0.64	11.005296297485225
Polydopamine	800	0	0	5.24	6.19	3.8	46.76	24.92	6.56	0.94	9.69	1.64	2.83059	0.00838	0.11	23.3	218	0.61	11.09884947694514
carboxylated chitosan and phytic acid	800	0	0	3.01	2.49	3.58	77.52	15.15	4.23	0.97	2.26	0.854	3.17938	0.007175	0.04	42.7	131.9	0.4922179691330625	11.320976639652478
leonardite humic acid	900	0	0	1.1	6.9	3.99	46.3	14.9	3.73	1.67	11.566719596488198	-0.0491527	0.803457	0.002357	0.18	59	224.9	0.28	10.215012102396612
leonardite humic acid	1100	0	0	0.8	6.7	3.9	46.8	16	4.1	1.61	15.574522292382447	-0.188412	0	0.002209	0.21	58	238.3	0.28	10.060254186592909
leonardite humic acid	1300	0	0	0.4	6.6	3.72	47.1	17	4.57	1.52	12.377707088037774	-0.029449	0.582063	0.001653	0.26	67	282.3	0.21	9.829064969543705
leonardite humic acid	1500	0	0	0.3	3.2	3.68	49.2	17.6	4.78	1.12	12.284608918009745	-0.0107124	0.506505	0.001289	0.3	73	300.5	0.2	9.650351108007273
leonardite humic acid	1600	0	0	0.2	2.6	3.62	51.2	18	4.97	1.09	14.170258394433834	-0.16137	0.0253059	0.002587	0.27	75	239.1	0.17	9.623498488187936
biowaste	700	0	0	3.9	3.6	3.75	49.53	21.65	5.77	1.72	2.37	0.194	2.51441	0.0024	0.28	53.6	81.9	0.49	10.796613559757096
biowaste	700	0	0	4.5	5.6	3.72	77.35	21.37	5.74	1.76	2.92	0.155	2.32552	0	0.73	52.3	98	0.52	10.932837119286855
biowaste	700	0	0	4	7.8	3.7	53.56	20.49	5.53	2.01	6.59	0.177	2.03019	0.0152	0.91	50.5	140.9	0.54	10.675199013551117
biowaste	1000	0	0	2	1.7	3.67	59.91	23.55	6.42	1.2	15.18	0.103	1.43297	0.002	0.86	67.2	140.8	0.35	9.884504055047136
biowaste	1000	0	0	1.7	4.8	3.69	62.87	22.56	6.11	1.22	11.97	0.067	1.35025	0.0036	0.95	65.1	107.7	0.38	10.12970934279771
biowaste	1000	0	0	3.2	9.7	3.72	69.83	20.35	5.47	1.41	4.51	0.23	2.30942	0.0368	2.22	51.7	2.4	0.61	11.001281993476416
peanut shell	1100	0	0	0.7	10.6	4.08	53.54	20.34	4.99	0.98	66.34	0.464	1.47422	0.01645	0.17	94.1	266	0.28	7.125645476044432
Corncob	1100	0	0	0.5	10.3	4.06	53.52	19.98	4.92	1.01	2.49	0.139	2.34753	0.016375	0.15	94	218.6	0.27	9.466623313589446
pine pollen	900	0	0	0.81	8.03	4.1	62.4	17.78	4.34	1.07	4.83	0.207	2.23437	0.004345	0.23	59.8	219.5	0.31	10.63
hornet’s nest	1000	0	0	3.22	7.48	3.94	66.86	17.73	4.5	0.89	4.99	0.187	2.17647	0.037493	0.22	56.8	176.7	0.25	10.635574933922765
hornet’s nest	1200	0	0	1.52	6.93	3.91	53.42	17.95	4.59	0.92	5.07	0.115	1.95832	0.023205	0.24	67.4	216.8	0.23	10.193124430579124
hornet’s nest	1400	0	0	0.7	4.94	3.83	56.67	19.2	5.01	1.01	6.97	0.09	1.71466	0.023122	0.3	68.6	221.9	0.23	10.075145178730391
hornet’s nest	1000	0	0	2.47	14.47	3.93	60.24	17.84	4.54	1.273768071950634	4.49	0.155	2.13941	0.054371	0.29	58.2	150.1	0.24	10.580361199304178
hornet’s nest	1200	0	0	1.82	9.02	3.82	60.82	17.97	4.7	1.3189869007383608	5.22	0.152	2.06666	0.030808	0.31	62.2	179.9	0.22	10.35476523294596
hornet’s nest	1400	0	0	0.94	9.73	3.74	62.79	19.3	5.16	1.3083860921260044	5.54	0.138	1.99948	0.025776	0.32	62.1	205.9	0.19	10.338703992514532
gelatin	1000	0	0	3.92	3.28	4.96	44.4	18.2	3.67	0.99	2.17	0.21	2.58805	4.3e-07	0.06	61.6	337.4	0.27	9.52
gelatin	1200	0	0	1.3	2.81	4.23	45.3	19.5	4.61	0.97	2.23	0.189	2.52956	8.3e-07	0.05	73.8	395.4	0.21	8.48
gelatin	1400	0	0	0.52	2.12	3.85	46.3	22.1	5.74	0.95	2.37	0.17	2.45758	8.9e-07	0.06	74.4	312.3	0.2	9.04
lignin	1300	0	0	0.8	14.4	3.75	38.2	15.6	4.16	1.29	5.55	0.007	0.690196	0.00489	0.23	70.1	237.5	0.13	9.56
Jackfruit	1000	0	0	1.89	7.45	3.76	51.73	15.74	4.19	0.98	19.31	0.00347	0.181844	0.010425	0.14	57	141.4	0.32	10.139380668476548
Jackfruit	1100	0	0	1.53	7.46	3.88	48.54	15.08	3.89	0.99	17.03	0.00395	0.212188	0.0071	0.16	62.3	151.9	0.28	10.05227285042103
Jackfruit	1200	0	0	1.41	7.15	3.86	56.2	17.57	4.55	0.99	12.97	0.00553	0.426511	0.00505	0.22	66.2	158.7	0.26	8.82
Jackfruit	1300	0	0	1.38	6.19	3.85	64.83	17.86	4.64	1	8.27	0.00559	0.545307	0.0102	0.14	67.5	141.8	0.34	10.254328428932459
cocklebur fruit	900	0	0	1.96	4.05	3.8	52.29	18.2	4.79	2.33	3.22	0.075	1.97234	0.000238	0.06	50.6	180	0.44	10.777507831809247
cocklebur fruit	1000	0	0	1.49	5.91	3.79	55.27	18.15	4.79	2.04	3.76	0.069	1.86558	0.000198	0.06	62.4	210.6	0.4	10.388634262826635
cocklebur fruit	1100	0	0	0.68	5.17	3.76	52.28	19.63	5.22	1.79	3.6	0.058	1.8072	0.000185	0.08	69.1	235.5	0.38	11.49
agar	750	0	0	2.2	6.0034703292931235	3.67	64.62	15.5	4.22	1.73	3.22	2.3479	3.46449	0.001727	0.2	70.7	402.6	0.88	11.21
agar	900	0	0	1.8	5.808697034366481	3.77	83.04	18.03	4.78	1.77	3.06	3.0531	3.60108	0.001766	0.23	74.9	438.1	0.84	10.97
agar	1050	0	0	1.1	7.130544884197712	3.59	58.09	14.32	3.99	1.41	2.92	1.7209	3.37218	0.005584	0.14	68.1	163.1	0.91	11.51
banana peel	900	0	0	0.45	8	3.95	45.2	17.4	4.41	0.987	2.16	0.913	3.22851	0.012464	0.21279358418089467	89.8	347.4221453134878	0.82	7.89
banana peel	900	0	0	2	3	3.93	48.3	17.8	4.53	1.410987273853999	2.18	0.448	2.91463	0.057344	0.26517520228422703	82.4	269.83544858477705	0.35	9.784706719768291
banana peel	900	0	0	3.39	3.38	3.91	49.6	18.2	4.65	1.037	2.33	0.145	2.39721	0.065056	0.28223801274367855	84.6	261.2381912334904	0.23	9.740348147150376
banana peel	900	0	0	6.51	3.54	3.87	51.3	18.5	4.78	1.3782037896123476	5.42	0.02	1.16702	0.091024	0.2874139634460746	84.5	262.3165691061199	0.11	9.654796209170499
banana peel	900	0	0	9.4	3.76	3.85	52.4	18.7	4.86	1.032	7.13	0.016	0.952792	0.104368	0.8	86.8	265	0.11	9.549197162032602
banana peel	900	0	0	9.92	3.77	3.8	52.6	18.9	4.97	1.349095842108478	7.58	0.016	0.937016	0.102688	0.29193021774339584	85.3	268.117923860317	0.1	9.566899761754911
banana peel	900	0	0	10.57	3.51	3.62	58.8	23.8	6.57	0.979	7.98	0.009	0.634477	0.071552	0.2894011687834533	81.6	254.22400793818153	0.09	9.605755363427022
cucumber stem	900	0	0	2.79	11.18	3.87	16.3	7.5	1.94	1.82	5.02	0.072	2.16779	0.00026	0.18	63	257.9	0.59	13.39
cucumber stem	1000	0	0	2.14	10.81	3.83	17.6	8	2.09	1.69	4.84	0.11	2.40391	0.000312	0.16	65.4	232.1	0.54	13.25
cucumber stem	1100	0	0	1.25	8.48	3.8	19.8	9.7	2.55	1.65	4.89	0.114	2.49503	0.000166	0.2	62.5	228.5	0.6	13.66
cucumber stem	1100	0	0	0.99	4.9	3.69	18.5	6.9	1.87	1.05	3.82	1.63	3.29861	0.000325	0.19	37.6	332.7	0.74	11.34
peanut skin	800	0	0	0.45	4.23	3.7	44.72	8.8	2.38	1.57	2.65	1.28	3.28556	0.000193	0.15	33	278.9	0.67	11.308657064055359
peanut skin	800	0	0	0.65	3.41	3.7	42.76	7.9	2.14	1.61	2.7	1.69	3.39794	0.000341	0.14	33.9	383.1	0.69	11.139885061965057
peanut skin	800	0	0	0.26	3.79	3.9	43.13	7.8	2	1.89	2.35	0.84	3.15534	0.000274	0.14	30.7	198.5	0.55	11.518232839037196
peanut skin	800	0	0	0.54	2.9	3.9	47.13	6.9	1.77	1.94	2.76	1.09	3.19866	0.000159	0.1	29.3	208.7	0.55	11.57309942918296
palm leaves	800	0	0	6.54	4.42	3.89	46.89	17.52	4.5	1	26.73	0.137	1.31112	0.010798051691747293	0.15	46	232.2	0.39	10.026061735871608
palm leaves	900	0	0	5.26	5.69	3.83	53.84	17.28	4.51	1.07	40.83	0.148	1.16167	0.00014	0.19	45	282.8	0.37	9.505179328267054
palm leaves	1000	0	0	4.6	5.55	3.77	52.8	16.73	4.44	1.05	38.77	0.06	0.793092	0.010579169637427423	0.32	55.8	290.4	0.27	9.42
palm leaves	1100	0	0	2.78	5.55	3.99	60.46	19.34	4.85	1.03	36.56	0.127	1.15076	0.00206	0.35	53	246.9	0.25	9.457711523956917
cherry petals	1000	0	0	1.4	12	3.96	49.08	15.08	3.81	1.03	18.19	0.008	0.269513	0.088525	0.2	67.2	236.4	0.23	9.729635654926218
Ganoderma lucidum spore	900	0	0	2.97	8.52	3.68	63.46	17.38	4.72	0.99	2.49	0.205	2.51799	0.01800235009770578	0.09	22.9	82.2	0.42	11.799640140235946
Ganoderma lucidum spore	1100	0	0	1.53	6.89	3.79	52.55	19.51	5.15	1.03	6.99	0.035	1.3075	0.015080581656091333	0.31	45.7	153	0.26	10.79164788392563
Ganoderma lucidum spore	1300	0	0	0.86	5.66	3.75	60.04	18.58	4.95	1.01	9.19	0.041	1.25285	0.014411331831116429	0.28	50.4	199.6	0.22	10.571544271474895
Ganoderma lucidum spore	1400	0	0	0.8	5.3	3.71	60.01	21.77	5.87	1.09	9.14	0.034	1.16732	0.003636	0.41	61.5	246.8	0.21	10.118815236403357
Ganoderma lucidum spore	1500	0	0	0.76	4.69	3.65	59.85	24.25	6.64	1.15	11.97	0.038	1.1038	0.01660157137319397	0.39	55.3	174.7	0.2	10.245242838352596
phenol-aldehyde	1200	0	0	2.24	3.3	4.03	45.24	17.77	4.41	0.94	20.1	0.583	2.06446	0.083778	0.11	38.4	165.5	0.31	7.19
phenol-aldehyde	1400	0	0	1.31	3.07	3.78	43.3	22.73	6.01	1.02	47.04	1.153	1.99123	0.063011	0.26	52.5	297.1	0.3	7.51
phenol-aldehyde	1600	0	0	0.68	2.37	3.68	67.32	25.61	6.96	1.21	74.28	2.005	2.03342	0.083633	0.11	29.5	118.3	0.42	8.74
longan shell	600	0	0	0.76	5.08	3.77	34.97	13.06	3.46	1.15	1.08	0.658	3.38625	1e-06	0.03	87.9	162.1	0.38794630959187215	9.852112419109925
longan shell	700	0	0	1.05	4.61	3.71	31.82	12.04	3.25	1.11	1.16	0.733	3.40142	7.5e-07	0.02	85.7	176.4	0.4067853279152931	9.900633065994352
longan shell	800	0	0	1.19	4.79	3.77	29.91	11.64	3.09	1.09	0.32	0.237	3.47566	2.4e-07	0.05	80	338	0.89	9.849378446535484
longan shell	850	0	0	0.86	5.16	3.84	41.57	14.3	3.72	1.06	1.2	0.579	3.28497	8.2e-07	0.03	93.7	168.9	0.3624316884404807	9.681762341802994
lignin and divinylbenzene	1400	0	0	0.88	7.63	3.8	31.34	13.98	3.68	0.87	6.16	0.0084	0.737193	0.019833	0.31	78.19	129.6	0.22	12.13
lignin and divinylbenzene	1400	0	0	0.68	7.89	3.85	24.41	13.66	3.55	1.1	7.67	0.0015	-0.107905	0.021933	0.31	80.47	140.5	0.23	9.79280403103903
lignin and divinylbenzene	1400	0	0	1.43	8.26	3.87	23.82	12.87	3.33	1.09	9.03	0.0019	-0.0705811	0.018611	0.28	79.07	178.6	0.22	9.745222863648522
lignin and divinylbenzene	1400	0	0	0.51	8.83	3.9	21.7	11.71	3	1.14	4.31	0.0037	0.546543	0.015367	0.24	77.46	165.3	0.23	9.982548122635704
glucose	1400	0.06	0	0	5.18	3.8	40.64	10.8	2.84	1.03	1.99	0.049	1.90988	0.024375	1.22	90.7	199.7	0.19	9.767703862735019
glucose	1400	0.26	0	0	5.46	3.82	40.64	10.8	2.83	1.05	2.1	0.028	1.6465	0.031675	1.08	92.2	242.4	0.17	10.92
glucose	1400	0.32	0	0	5.78	3.83	40.75	10	2.61	1.06	2.71	0.08	1.94498	0.03035	1.13	90.2	111.3	0.22	9.905177402418268
coffee grounds	1000	1.02	0	0	9.89	3.68	64.9	17.84	4.85	0.9	3.61	0.052	1.76185	0.063433	0.24	49.9	153.6	0.26	11.06
lignin	1300	0.6	0	2.2	6.3	3.58	62.7	18.4	5.14	1.13	7.53	0.027	1.15836	0.001611	0.19	79.1	264.5	0.14	9.16
phytic acid	800	6.37	0	25	14.64	4.7	51.62	11.08	2.36	1.08	3.12	0.34	2.63883	0.006235	0.18	38.5	205.4	0.77	15.5
banana peel	800	0.03	0	1.93	6.23	3.97	21.2	15.6	3.93	1.28	7.15	0.059	1.51851	0.001941	0.16	63	294.9	0.33	10.02059400240534
banana peel	1100	0.05	0	0.89	4.47	3.91	41.5	15.9	4.07	1.1	10.78	0.052	1.28556	0.001539	0.19	70	311.1	0.31	9.769338489865396
banana peel	1400	0.02	0	0.34	4.27	3.84	73	20.4	5.31	1.08	12.97	0.047	1.16137	0.001947	0.25	73	303.7	0.2	9.673554511121397
banana peel	800	0.04	0	2.02	7.05	3.99	24.3	15.9	3.98	1.27	4.33	0.23	2.33706	0.001833	0.21	61	273.6	0.4	10.212251075095129
banana peel	1100	0.05	0	2.04	5.4	3.92	43.6	16.2	4.13	1.09	5.81	0.19	2.11661	0.001125	0.19	68	322.3	0.37	9.99005441233118
banana peel	1400	0.03	0	0.86	4.5	3.86	74.3	21.2	5.49	1.06	9.02	0.14	1.79309	0.001876	0.22	71	296.2	0.24	9.870268761214355
coal pitch	900	2.86	0	0	10.15	3.67	38.54	23.1	6.29	1.33	5.26	0.136	2.0141	0.007401804741248996	0.1	66	265.6	0.66	9.941749406354951
coal pitch	900	2.82	0	0	11.37	3.64	42	25.24	6.93	1.32	6.64	0.066	1.59988	0.000599	0.08	66	199.3	0.42043821389593516	9.956742838365805
polyacrylonitrile	1000	1.4	0	0	8.010188380663774	3.83	41.96	21.84	5.7	1.12	1.58	0.02	1.70439	0.002472	0.14	55.7	266.2	0.36	13.46
phenolic resin	800	0.73	0	0	9.24	3.94	44.54	24.14	6.13	0.957	2.52	0.1921	2.48437	3.7e-05	0.04	52.1	115.2	0.42	9.69
phenolic resin	800	1.22	0	0	10.98	4.11	51.9	24.08	5.86	0.971	3	0.216	2.45912	2.8e-05	0.07	67.95	293.5	0.63	9.36
phenolic resin	800	1.69	0	0	11.11	4.16	62.58	24.07	5.79	0.976	7.72	0.0893	1.66529	2.6e-05	0.13	58.1	206.3	0.6	10.12
original asphalt	1300	0.71	0	0	3.46	3.82	48.97	9.53	2.49	1.23	10.74	0.003	0.0293838	0.000317	0.25	72.68	245.3	0.37	8.68
Subbituminous coal	1000	1.83	0	0	9.02	3.73	18.1	14.3	3.83	2.7	5.65	0.07	1.69548	0.003937	0.08	64	88.5	0.5	8.47
agar	750	0.2	0	0	7.179299220548255	3.79	62.77	20.77	5.48	1.67	7.24	1.6614	2.96237	0.007392	0.1011969373805052	31.6	277	0.79	10.994236857941738
agar	750	1.03	0	0	8.291778885320594	3.91	52.49	18.13	4.64	2.04	3.86	0.6814	2.8488	0.006791	0.12	42.1	394	0.8	8.37
agar	750	1.35	0	0	9.254067537698386	3.96	56.14	11.18	2.82	1.56	2.94	0.2793	2.57978	0.007241	0.15704688168816514	28	198	0.71	11.548758277029298
agar	750	1.54	0	0	9.39986584560203	3.99	35.91	18.08	4.53	1.69	6.15	0.3222	2.32015	0.006481	0.15830737037557713	37.7	128	0.48	11.008907395620298
Triphenylphosphine	500	4	0	0	10.3	3.71	50.56	25.43	6.85	1.3174547848766955	36.77	1.869	2.3082	2.5e-05	0.01	74.1	329.0265283658954	0.73	8.511809546504221
Subbituminous coal	1000	0.89	0	0	6.34	3.71	47.93	24.91	6.71	1.07	4.46	0.404	2.55895	0.005772	0.21	48.1	188	0.77	8.66
sucrose	800	2.04	0	0	10.89	3.68	52.29	22.4	6.09	1.43	13.35	0.23	1.83822	0.000673	0.09	60.36027169962531	285.3	0.79	9.863465699957521
melamine	800	14.36	0	19.25	29.71	3.99	92.5	18.98	4.76	1.13	15.75	0.015	0.568319	0.00316	0.15	38.5	354.4	0.81	10.99
Vine shoots	800	0.06	0.17	1.47	4.06	3.85	28.75	8.87	2.3	2.44	4.86	0.1	1.91381	0.01134547858556037	0.05	56.12	159.7	0.35	10.68556229431496
Vine shoots	1000	0.06	0.07	1.02	3.38	3.81	38.22	8.74	2.29	2.07	17.11	0.073	1.23045	3.8e-06	0.08	70.57	251.7	0.23	7.36
Vine shoots	1200	0.1	0.16	0.52	4.42	3.79	43.03	9.13	2.41	1.9	19.74	0.084	1.23045	0.013776414346124866	0.09	79.44	240.1	0.16	9.447105645586287
Vine shoots	800	0.09	0.14	1.91	3.48	3.83	30.68	8.72	2.28	2.83	3.81	0.132	2.14301	0.011087554962292594	0.06	60.41	235.2	0.29	10.585808068445388
Vine shoots	1000	0.1	0.18	1.1	3.57	3.78	36.12	9.34	2.47	1.74	16.07	0.092	1.36173	1.27e-05	0.1	71.53	272.8	0.22	7.32
Vine shoots	1200	0.15	0.25	0.64	4.39	3.79	48.26	9.16	2.42	1.91	20.6	0.067	1.11394	0.010471918506414758	0.11	76.32	303.8	0.18	9.437721576738667
Vine shoots	1000	0.04	0.11	1.21	4.62	3.8	34.7	9.24	2.43	2.11	8.11	0.223	2.04139	2.27e-05	0.08	53.28	260.9	0.29	7.39
PAN/Lignin	800	3.77	0.1	8.68	13.91	3.72	58.69	18.78	5.05	0.554	10.74	0.019	0.849788	0.0007715	0.09	78.86	220.8	0.73	9.71010532385635
Polydopamine	800	3.08	0	5.52	10.98	4	41.64	24.86	6.22	1.03	7.66	0.36	2.27416	0.006769	0.07	43.2	215.7	0.72	10.586553268613073
Polydopamine	800	5.19	0	6.05	14.13	4.1	48.71	21.62	5.27	1.1	4.6	0.55	2.67943	0.006349	0.09	46.9	267.5	0.79	10.618595530392806
phytic acid cross-linked polyaniline	800	2.3	0	5.6	10	3.72	15.45	7.86	2.11	1.18	37.59	0.303	1.5084	0.000579	0.1	50.4	182.8	0.56	9.62606596280224
phytic acid cross-linked polyaniline	900	1.7	0	7.8	4.5	3.72	17.51	7.73	2.08	1.07	31.92	0.3	1.57507	0.000656	0.14	52.4	200.4	0.39	9.794119233974369
phytic acid cross-linked polyaniline	1000	1.8	0	8.1	8.9	3.74	23.75	8.62	2.3	1.07	36.96	0.284	1.4908	0.000995	0.14	53.9	196.3	0.32	9.57510812298366
phytic acid cross-linked polyaniline	800	1.7	0	3.9	9.3	3.65	15.77	7.91	2.17	1.26	15.5	0.529	2.13532	0.000483	0.1	47.6	190.2	0.55	10.463307445661428
phytic acid cross-linked polyaniline	900	0.2	1	6.5	7.4	3.63	17.75	8.35	2.3	1.24	24.32	0.548	1.95482	0.000708	0.02	46.6	187.8	0.5	10.220292746596526
phytic acid cross-linked polyaniline	1000	1.8	0	4.4	8.8	3.7	19.98	8.02	2.17	1.1	28.67	0.433	1.78118	0.000856	0.13	49	194.6	0.46	9.977978331881344
phytic acid cross-linked polyaniline	800	1.7	0	3	6.8	3.7	14.55	7.89	2.13	1.21	28.72	0.254	1.54876	0.000505	0.11	50.5	207.5	0.57	9.888998804464332
phytic acid cross-linked polyaniline	900	0.8	0.3	4.4	6.9	3.69	17.55	7.97	2.16	1.17	30.89	0.341	1.64503	0.000732	0.14	49.8	210.8	0.53	9.851047579436461
phytic acid cross-linked polyaniline	1000	1.7	0	2.2	7.1	3.72	20.95	8.26	2.22	1.14	37.18	0.305	1.51601	0.000969	0.13	52.5	189.1	0.37	9.578577386560358
carboxylated chitosan	800	1.64	0	8.46	5.85	3.7	64.71	14.89	4.02	1.12	3.04	2.177	3.45656	0.004664	0.04	61.9	233.3	0.93	10.568329817584369
Ganoderma lucidum	800	0.81	0.2	1.81	5.14	3.83	15.98	12.11	3.16	0.92	10.78	0.62	2.36173	0.008881570718870222	0.13	66.7	188.9	0.43	10.007877374100794
Ganoderma lucidum	900	0.47	0.2	2.25	4.06	3.92	18.58	12.87	3.28	1	5.55	0.47	2.5302	4e-07	0.07	73	251.6	0.39	9.923895267281823
Ganoderma lucidum	1000	0.55	0.17	1.79	7.43	3.81	19.69	13.11	3.44	1.04	6.3	0.37	2.37107	0.0085231017056383	0.08	75.4	229	0.33	9.8461346075157
asphalt	900	2.48	0	2.75	9.6	4.03	38.49	8.23	2.04	0.82	14.916425230259296	0.054063363191111435	0.955688	0.000123	0.19	34.45	94.6	0.38	11.106924585386222
asphalt	1100	1.12	0	1.97	5.24	3.93	47.78	8.88	2.26	1.02	14.277190431338369	-0.0909113	0.32838	0.000361	0.23	68.27	251.9	0.28	9.984360031238113
asphalt	1300	0.68	0	2.41	3.16	3.9	50.78	9.11	2.34	1.14	18.69	0.012	0.39794	0.000317	0.21	71.07	266.7	0.21	9.745868822532247
asphalt	1300	0.55	0	1.36	5	3.96	45.31	8.72	2.2	1.17	10.471775119616709	-0.0084826	1.09899	0.000258	0.15	55.24	108.3	0.26	10.682873281228641
Polyvinyl Alcohol	800	3.89	0	0.92	12.399029655413216	3.98	52.93	17.79	4.47	1.01	2.73	0.138	2.30792	0.002083	0.05	75	253.4	0.42	8.45
PAN/Lignin	800	0	0.46	6.14	14.87	3.55	55.88	20.45	5.76	0.619	2.1	0.155	2.46915	0.0013355	0.07	48.5	143.9	0.49	10.897751245228212
Vine shoots	1000	0	0.05	0.91	4.15	3.81	36.53	9.55	2.51	1.93	8.44	0.264	2.09691	2.48e-05	0.06	57.66	214.4	0.3	7.32
apricot shells	900	0	0.84	0.87	6.67	3.92	46.6	11.8	3.01	2.08	3.39	0.0023	0.431364	0.001961	0.18	66	286	0.3378797347116274	10.299152681738708
apricot shells	1100	0	0.34	0.54	1.45	3.93	50.2	12.2	3.1	1.82	3.25	0.0375	1.6637	0.00204	0.23	65	306	0.36598102372586827	10.321472169367182
apricot shells	1300	0	0.23	0.34	0.97	3.87	51.6	12.4	3.2	1.56	7.27	0.0227	1.09691	0.001298	0.4	69	363	0.33945718649452744	9.986232203555963
apricot shells	1500	0	0.16	0.21	0.8	3.79	52.4	12.7	3.35	1.39	5.96	0.0168	1.05308	0.001203	0.48	71	343	0.31352899409042645	10.003556160540036
apricot shells	900	0	0.16	0.99	4.59	3.92	50.3	12.7	3.24	1.89	3.87	0.027	1.4456	0.002572	0.24	73	280	0.41	10.089301554527301
apricot shells	1100	0	0.12	0.76	0.27	3.88	58.7	12	3.09	1.67	3.08	0.044	1.75358	0.001577	0.26	77	323.89	0.41	10.014371849135657
apricot shells	1300	0	0.08	0.46	0.12	3.82	61.9	12.2	3.19	1.45	6.27	0.021	1.1271	0.001147	0.4	79	364.88	0.25	9.796739774562464
apricot shells	1500	0	0.05	0.28	0.06	3.72	65.1	12.6	3.39	1.35	5.36	0.017	1.09342	0.002158	0.35	80	323.89	0.18	9.868586044465713
starch	900	0	0.03	0.12	1.68	3.75	47.96	11.94	3.18	1.359	8.117428824911926	-0.0320048	1.091247603413766	0.000525	0.28	80	155.5	0.18	9.9425902815533
starch	1100	0	0.03	0.37	0.76	3.74	43.25	12.08	3.23	1.283	8.30649445545275	0.006122250968393195	1.0773304650159856	0.000426	0.26	85.2	198.9	0.24	9.703952162885054
starch	1300	0	0.03	0.35	0.57	3.73	51.76	13.87	3.72	1.243	8.642687421247274	0.007315093923877469	0.9650576704594632	0.000618	0.29	86.5	249	0.2	9.58420669606107
starch	1500	0	0.02	0.1	0.46	3.68	53.92	14.08	3.83	1.232	8.556965872852608	0.04443415957678115	0.9596534016470141	0.000393	0.36	90.5	271	0.26	9.446629984920673
starch	1700	0	0.03	0.05	0.32	3.51	54.68	14.71	4.19	1.042	8.918030164427051	-0.0599467	0.7663591912397738	0.000344	0.4	93.9	168.4	0.19	9.483105861379078
polyacrylonitrile	600	0	10.82	14.84	4.09	3.56	36.24	16.25	4.64	1.13	24.42	0.249	1.95718	0.002998	0.1198269750855051	78.13	517.6819238364892	1.28	8.986612726532204
polyacrylonitrile	700	0	4.73	14.43	8.6	3.58	49.83	13.42	3.75	1.06	5.76	0.22	2.54143	0.004562	0.11	60.5	406.3	0.83	10.317487452166711
polyacrylonitrile	800	0	1.79	11.81	4.91	3.52	33.12	25.75	7.32	1.01	12.7	0.511	2.63862	0.005288	0.07	52.2	214.4	0.85	10.175232241432553
D–(+)–glucose	1100	0	0.93	2.3451750734183694	3.53	3.59	47.435137175657204	16.068724708894603	4.43287489897227	1.02	2.67	0.163	2.38739	0.000113	0.11	73	232.7	0.35	10.140971264056194
cotton roll	700	0	3.35	0	9.91	3.81	47.13	29.13	7.65	1	2.12	0.163	2.48799	4.7e-05	0.21	62.6	261.8497572062528	0.57	10.111480966195646
Tangerine peel	800	0	0.86	7.17	0	3.96	48.42	23.45	5.92	0.95	1.75	0.558	3.10585	0.032188	0.1	14.07	255.7	0.37	10.74
polyacrylonitrile	650	0	6.1	13.27	6.34	3.8	45.6	14.06	3.7	1.06	5.19	0.0141	1.03583	0.005964	0.12	52.8	358.1	0.82	10.621211649300546
polyacrylonitrile	650	0	7.67	16.04	3.64	4.1	41.15	21.16	5.16	1.12	4.43	0.0271	1.38899	0.004044	0.11	64.58	440.5	0.87	10.067564893139203
coal tar pitch	600	0	12.47	0.82	2.54	3.58	41.5	27.08	7.56	1.1932669362014152	4.3	0.011	0.991226	0.000175	0.26	73.5	506.3	0.39	11.08
coal tar pitch	800	0	8.5	1.02	1.74	3.68	41.7	24.27	6.6	1.2392093432187783	2.47	0.049	1.90146	6.58e-05	0.3	65.2	409.8	0.39	10.46
coal tar pitch	1000	0	3.38	0.98	0.9	3.8	48.77	21.25	5.59	1.2792046595276598	2.29	0.138	2.38202	4.44e-05	0.09	44.5	169.9	0.46	10.58
Bacterial cellulose	800	0	7.98	0	11.67	4.1	41.39	26.91	6.56	1.05	0.89	0.149	2.82543	1.9e-05	0.05	68.18	346	0.83	9.965474801415638
corn starch	1100	0	1.44	1.08	5.39	3.81	52.41	28.76	7.55	1.03	6.25	0.358	2.75086	0.013846880690817933	0.26	84.41	268.7	0.5	9.369644245229667
corn starch	1150	0	1.7	1.16	9.22	3.86	54.74	25.45	6.59	1.21	3.99	0.369	2.83496	1.39e-05	0.21	70.26	295.8	0.75	9.88139037494808
corn starch	1190	0	1.11	0.78	6.07	3.76	59.09	23.71	6.31	0.94	3.64	0.163	2.47154	0.013127535785864126	0.15	66.37	253.7	0.47	10.130487099491047
walnut shell	600	0	1.4	1.1	9.3	4.01	45.14	21.06	5.25	0.9	5.013436782488164	0.36431012871849877	2.45332	0.003855	0.14	57.20338130876523	237.7	0.5020483397491406	10.34829538583274
walnut shell	800	0	1.2	1.3	11.1	3.99	43.06	17.16	4.3	1.07	4.29931001331876	0.4328395466334066	2.67486	0.004822	0.13	55.82727574115828	241.9	0.5359326847129903	10.471515782734254
walnut shell	1000	0	2.1	1.2	5.5	4.08	45.25	20.56	5.04	1.23	1.1922972830623095	0.5571663269532394	3.14176	0.004156	0.16	68.9	354.9	0.5691870328759218	10.015358886366865
walnut shell	1200	0	1.8	1.3	6.8	4.06	51.98	20.97	5.17	1.17	2.1251182024329793	0.5530011008149575	3.04258	0.005461	0.16	59.08554518987281	316.9	0.5741498519207137	10.330685258064012
dithiooxamide	500	0	2.17	34.4	0	3.6	36.482583284943225	15.013555861699793	4.481429900464162	1.26	7.5	0.4	2.40381	0.005933	0.28153614290880474	44	149.7	0.66	11.123560537240055
dithiooxamide	600	0	1.5	34.22	0	3.6	37.09684767375346	14.812788734059975	4.439702895614271	1.42	10.5	0.76	2.50188	0.007314	0.24263210083952502	41	185.9	0.66	11.040465431714285
dithiooxamide	700	0	1.07	30.29	0	3.6	40.47201877183115	14.774927397853649	4.345578128833624	1.45	12.4	0.96	2.70851	0.006601	0.55	47	304.2	0.67	10.611838281636452
4,6-diamino-2(1 h)-pyrimidinethione	800	0	0.61	22.48	4.91	3.38	28.24	38.39	11.36	1.18	9.8	0.0103	0.62634	1.6e-05	0.06	55.53	306	0.76	8.9
4,6-diamino-2(2 h)-pyrimidinethione	1000	0	1.44	7.73	4.07	3.41	36.73	32.13	9.42	1.07	6.09	0.0504	1.51957	1.2e-05	0.04	49.04	198.9	0.54	8.87
D-(+)-glucose	500	0	19.075	12.637	2.471	3.61	52.66	24.72	6.85	1.203	7.37	0.128	1.54352	0.00021	0.13	84.7	740.2	1.08	10.59
polyacrylonitrile	500	0	19.86	16.542	1.813	3.52	62.24	25.94	7.37	1.236	17.97	0.208	1.49371	-0.0121713	0.31	54	728.1	1.13	10.56
polyacrylonitrile	500	0	22.083	0	5.446	3.67	47.84383989486331	22.91	6.24	0.937	12.1	0.113	1.27114	0.000341	0.18	71.3	510.9	0.83	11.74
Jute fibers	700	0	13.74	0.42	6.16	3.76	42.1	18.44	4.9	0.919	13.19	0.01	0.488551	0.007352	0.15	60.6	336.1	0.55	10.081209709388451
Jute fibers	700	0	15.44	0.37	4.4	3.71	52.03	16.28	4.39	0.881	15.3	0.005	0.133539	0.005475	0.31	58.1	397.4	0.66	10.121024929511952
starch	1000	0	2.3	0	3.5	3.72	35.96	22.67	6.09	1.57	5.12	0.35	2.43648	0.020724	0.16	55.03	217.34	0.33	10.26
1,2,4,5-benzenetetracarboxylic anhydride	600	0	9.79	0	14.2	3.97	40.41	23.15	5.83	0.83	2.51	0.28	2.64943	0.007179	0.44	29.33	153	0.7007331463851704	11.495644524390483
1,2,4,6-benzenetetracarboxylic anhydride	700	0	8.69	0	11.64	4	40.52	26.82	6.71	0.9	3	0.291	2.5895	0.006818	0.58	44.65	142.5	0.6478239414778165	10.86832825430938
1,2,4,7-benzenetetracarboxylic anhydride	800	0	6.25	0	9.19	4	36.47	26.09	6.52	0.93	3.29	0.273	2.52035	0.003342	0.27	48.15	384.7	0.72	10.361939177950017
1,2,4,8-benzenetetracarboxylic anhydride	900	0	4.89	0	8.2	3.86	36.55	26.17	6.78	1	3.3	0.265	2.50583	0.003004	0.45	44.65	285.9	0.616061041669627	10.585826005755898
m-phenylenediamine and formaldehyde	1200	0	0.04	3.89	7.6	4.25	89	25	5.88	2.69	3.45	0.013	1.16137	0.048478	0.18	71	283.3	0.28	10.075364409910588
m-phenylenediamine and formaldehyde	1400	0	0.05	3.74	0.86	3.85	115	30	7.79	1.99	8.77	0.019	0.934498	0.012289	0.07	87	376.6	0.34	9.346460310354466
m-phenylenediamine and formaldehyde	1600	0	0.13	2.37	1.55	3.6	148	36	10	1.29	9.59	0.155	1.81023	0.047533	0.16	57	155.3	0.32	10.51229765463272
k-carrageenan	600	0	1.5	0	7.8	3.4	50.92	19.14	5.63	1.37	3.42	0.42	2.69108	3.9e-06	0.08	28.2	121.3	0.5	11.45834855908718
k-carrageenan	600	0	0.7	12.6	8.7	3.5	50.58	13.12	3.75	1.67	2.13	0.3	2.75051	2.1e-06	0.18	28.3	247.4	0.89	11.513229207211625
k-carrageenan	600	0	0.8	9.3	7.1	3.6	71.8	14.08	3.91	2.27	2.47	0.36	2.76492	5.1e-06	0.12	31.9	251.2	0.83	11.461842726236707
k-carrageenan	600	0	0.7	8.6	6.3	3.6	64.77	16.22	4.51	1.85	1.98	0.38	2.88536	3.8e-06	0.19	36.5	287.7	0.84	11.211187098049532
Mango-peels	800	0	2.51	3.93	8.51	4.8	63.87	20.94	4.36	0.98	2.25	0.23	2.61171	0.005387	0.36	52	350	0.3	10.3
tire rubber	1100	0	1.1	0	14.8	4.7	93.38	25.28	5.38	0.85	3.6	0.17	2.27646	0.163475	0.44	48	138.1	0.54	10.926317217263577
tire rubber	1400	0	0.6	0	4.4	4.5	71.12	27.72	6.16	0.96	4.03	0.212	2.32222	0.136325	0.65	57	69.8	0.19	10.626264750217533
tire rubber	1600	0	0.5	0	3.6	4	73.6	37.23	9.31	0.99	5.15	0.191	2.17026	0.12825	0.78	66	84.1	0.15	10.108438500194454
polyacrylonitrile	600	0	8.19	13.42	1.78	4.2	64.29	25.17	5.99	1.55	24.85	0.131	1.32531	1e-06	0.12	50.5	473.7	0.99	8.99
disposable mask	1600	0	0.3	0	2.7	3.6	15.7	17.9	4.97	1.35	7.74	0.053	1.43775	0.002497	0.16	68.1	288.6	0.14	6.6
disposable mask	2000	0	0.1	0	1.1	3.53	16.1	19	5.38	1.46	10.79	0.048	1.25042	0.002322	0.24	86	261.6	0.13	6.5
disposable mask	2400	0	0.1	0	1	3.42	29.9	52.6	15.38	1.3	12.24	0.041	1.1271	0.001673	0.17	74.5	136.5	0.13	6.44
potassium gluconate	850	0	2.88	12.74	13.23	4.27	54.15	12.97	3.04	1.04	2.908	0.586	3.01155	5.5e-05	0.16	69.5	430.8	0.764506045795873	6.63
potato starch	1300	0	0	0	7.503244042932061	3.82	37.45	11.29	2.96	1.2	0.59	0.02052	2.14489	0.018103868489469592	0.03	34.7	19	0.22	10.83
potato starch	1300	0	0	0	5.72392662768502	3.83	36.73	11.03	2.88	1.11	0.8	0.00014	-0.154902	0.01600575778052027	0.11	56.9	106.3	0.22	10.75
potato starch	1300	0	0	0	5.971401240785914	3.82	35.14	10.91	2.86	1.15	0.82	0.00384	1.27254	0.013124	0.19	76.8	217.1	0.16	10.83
potato starch	1300	0	0	0	5.821624288431074	3.83	33.25	12.58	3.28	1.24	0.43	0.00024	0.346353	0.02492	0.15	65.5	158.7	0.15	10.31
waste tea bag	600	0	0	1.9776554768535752	7.3902985015641285	3.89	30.67	12.87	3.31	0.82	5.35	0.45	2.61805	0.005621	0.03	58	152	0.54	10.54317930573363
waste tea bag	800	0	0	2.438355992262629	7.440964499880293	3.86	39.6	14.8	3.83	0.77	5.99	0.33	2.83123	0.005609	0.05	51.7	167	0.53	10.679434765434667
waste tea bag	1000	0	0	2.436264915108455	7.322225256327069	3.84	30.18	12.54	3.27	0.69	5.47	0.28	2.71684	0.004885	0.06	61.4	193	0.55	10.391036513378394
Sepals of Palmyra palm fruit calyx	700	0	0	0.9789821855507008	6.140394301453713	3.77	28.08	12.66	3.36	3.1	4.6	0.21	2.26245	0.000261	0.14	70	202	0.63	10.130695816734722
Sepals of Palmyra palm fruit calyx	500	0	0	0.19502754286939172	5.349471175967587	3.82	24.29	12.05	3.15	3.8	11.6	0.058	1.30103	0.000553	0.28	61	189.4	0.34	10.145077234955519
Sepals of Palmyra palm fruit calyx	900	0	0	0	6.512198862094058	3.72	26.37	12.46	3.35	2.39	3.6	0.479	2.72591	0.00018	0.27	72	178	0.32	10.137401727734105
cellulose	1300	0	0	0	6.134069179617061	3.75	20.7	10.3	2.75	1.64	4.16	0.03	1.4609	-0.0080523	-0.0206993	33.9	388.7	0.68	10.904975883635126
cellulose	1300	0	0	2.3923521687620832	5.000753866301093	3.75	28.2	11.3	3.01	1.35	12.06	0.005	0.255273	0.0010643515378755781	0.13302239281916534	78.3	391.3	0.58	9.415347428637151
lignite	800	0	0	1.506024933709417	4.828193847269659	3.63	59.54	15.7	4.33	1.78	7.63	0.003	0.127105	0.001894	0.13	74.85	248.6	0.6	9.838214480527945
Camellia shell	800	0	0	5.5728390193738395	5.7886338706505835	3.78	34.48	9.44	2.5	0.82	3.87	0.365	2.57703	0.005978	0.11	44.1	562.6	0.62	10.499161350984323
Sucrose	1300	0	0	0.40689627512435367	5.265872613832923	4.13	21.5	13	3.15	3.23	2.09	0.018	1.53148	0.0686	0.13807583099687248	78.9	361	0.38	9.692967143606326
Sucrose	1300	0	0	0.5766200490667606	5.336350208621758	4.01	22.6	13.5	3.37	2.5	1.97	0.014	1.30103	0.054325	0.16739076207086617	85.2	350	0.39	9.53780680953708
Sucrose	1300	0	0	0.49194197541139406	5.231695873576114	3.98	24	14.2	3.57	2.38	1.94	0.006	1.11394	0.0587	0.16029827450101142	81.3	344	0.3	9.649992598133727
Sucrose	1300	0	0	3.1957134231349285	5.5517916686488435	3.91	25.3	14.6	3.73	1.92	84.95	0.04	0.240549	0.0627	0.08335788963137779	86.1	338	0.37	6.603375230633106
switchgrass	1000	0	0	3.2342262022698183	7.080462313735234	3.68	19.3	10.7	2.91	1.16	2.43	0.376	2.79169	0.02488	0.08	42	199	0.59	11.023354588005715
switchgrass	2050	0	0	2.202845363291318	6.128704245659245	3.52	30.7	14.8	4.2	1.05	2.93	0.0169	1.36173	0.016004	0.05	64	204	0.56	10.346176034115356
lotus seedpods	1000	0	0	3.912649484481438	7.116200138123013	3.77	25.7	9	2.39	1.08	1.24	0.233	2.87599	0.00012	0.17	45.8	222	0.88	12.45
lotus seedpods	1200	0	0	3.745478718703411	6.557322822164273	3.86	26.9	8.6	2.23	1.04	1.56	0.055	2.14829	0.001368	0.25	50.4	279	0.81	11.6
Bamboo powder waste	1000	0	0	0	7.707541552729183	4.56	44.74	16.07	3.52	1.3145263261867586	2.26	0.25	2.65031	0.0008	0.1197245423925379	52.3	319	1.04	10.547158338072807
Bamboo powder waste	1200	0	0	0	7.31731787488892	4.28	35.36	14.36	3.36	1.341364879301189	2.34	0.24	2.61805	0.000792	0.09070636616343318	55.4	354	0.93	10.39586284894218
camellia seed	1100	0	0	2.6991136253518295	6.405989796307661	3.76	45.37	10.94	2.91	0.97	4.81	0.049	1.60746	0.011024	0.4	66.1	233.8	0.77	10.341725652362795
camellia seed	1300	0	0	2.8309455000534625	5.881079736664265	3.75	56.8	12.78	3.41	1.12	6.19	0.032	1.31387	0.0026	0.28	71.6	252.2	0.8	10.059676863260714
camellia seed	1500	0	0	2.3469605088072276	5.537044017700013	3.7	60.12	14.34	3.88	1.15	13.71	0.021	0.792392	0.019536	0.38	70.9	285.8	0.59	9.813352142113622
cotton	1000	0	0	1.79354103071908	7.998031278871642	4.14	42.6	16	3.86	1.05	2.058	0.277	2.73078	0.006057	0.03	26	88	0.39	9.29
cotton	1300	0	0	0.765110201576038	6.196332255982522	4.1	40.3	16.2	3.95	1.1	2.027	0.0193	1.57978	0.004656	0.13	83	315	0.31	9.79
cotton	1600	0	0	0.3137250679233494	5.8486873842981275	4.02	34.4	16.6	4.13	1.29	3.297	0.0115	1.14613	0.011398	0.14	85	294	0.23	9.26
Disposable masks	1300	0	0	0	7.423738084116051	3.84	73.93	21.49	5.6	2.41	6.7	0.774	3.21924	0.018697557501300168	0.14	20.3	93.9	0.47	10.45
Disposable masks	1300	0	0	0	6.28003853827314	3.77	53.74	13.04	3.46	2.27	6.4	0.253	2.64395	0.002286	0.55	71.9	161.5	0.22	10.115652295566678
Disposable masks	1300	0	0	0	5.456607891315469	3.75	54.51	12	3.2	2.23	6.2	0.062	1.74819	0.002481	0.3	88.7	270.5	0.27	10.09
Disposable masks	1300	0	0	0	6.457714527855876	3.73	51.12	10.57	2.83	2.21	6	0.061	2.05346	0.002753	0.32	47.2	125.5	0.22	11.000331925106481
hazelnut shells	1400	0	0	0	5.92412217410994	3.83	70.85	11.62	3.03	1.62	4.98	0.0129	1.01536	0.0242	0.48	91	125.8	0.35	9.891699004326618
hazelnut shells	1400	0	0	0	6.099770074213641	3.75	65.79	10.38	2.77	1.74	3.63	0.0093	1.0103	0.027075	0.17	89	79.4	0.49	10.065623914264224
hazelnut shells	1200	0	0	0	5.437974166402908	3.92	60.48	10.54	2.69	2.04	2.93	0.0079	1.03222	0.01895	0.3023119484682244	83	281.8027867811202	0.37	9.926330217635913
hazelnut shells	1200	0	0	0	5.353584414439166	3.67	51.87	10.7	2.92	1.98	5.32	0.013	0.990339	0.02685	0.2937191937845509	84	263.0962287135849	0.32	9.79430811993085
hazelnut shells	1000	0	0	0	6.324213069938311	4.05	64.82	10.53	2.6	2.57	1.74	0.1337	2.48728	0.03555	0.29021259321626997	67	233.78424380084894	0.36	10.50031729937924
hazelnut shells	1000	0	0	0	5.4674253768853145	3.9	63.57	9.92	2.54	2.61	3.06	0.0175	1.36003	0.0336	0.30522851692259784	78	265.45848381328585	0.39	10.110709215861197
olive shells	1200	0	0	0	5.9190789626688245	3.85	40.85	27.73	7.2	2.62	56.36	0.031	0.342423	0.000218	0.14	64.5	167.2	0.54	8.232398205607211
olive shells	1300	0	0	0	5.400839179331325	3.79	59.23	23.1	6.09	1.79	33.85	0.022	0.414973	9.6e-05	0.24	78	288.1	0.4	8.675162221988746
olive shells	1400	0	0	0	5.277206662557079	3.64	63.69	31.3	8.6	1.73	17.65	0.015	0.531479	0.000158	0.19	77	214.1	0.39	9.223793927234688
olive shells	1300	0	0	0	5.614511650097953	3.8	55.05	20.94	5.51	2.1	24.99	0.061	0.991226	0.001296	0.22	77.6	279.6	0.45	9.035613627370369
olive shells	1300	0	0	0	5.824326298095031	3.77	55.08	21.2	5.62	1.76	46.04	0.048	0.623249	0.01735900075376068	0.22	78	240.8	0.4	8.33368688012963
olive shells	1300	0	0	0	5.635786048613156	3.78	52.72	21.62	5.72	2.02	17.82	0.041	0.959041	0.015460121908947674	0.21	77.8	281.7	0.4	9.32449722780433
Tangerine peel	800	0	0	0	0	3.9	43.4	28.16	7.22	0.92	1.9	0.533	3.05115	0.032724	0.11	39.9972757520156	153.6	0.4658624184653558	13.35
Tangerine peel	800	0	0	0	0	3.94	37.98	28.15	7.14	0.9	2.09	0.001	0.0413927	0.03156	0.11	62.10596396707193	119.6	0.17625429013195962	11.62
starch	1000	0	0	0	0	3.53	48.05	29.89	8.47	1.44	3.51	0.27	2.48756	0.031588	0.1	21.8	97.31	0.41	10.34
polyacrylonitrile	1000	0	0	0	0	3.74	50.59	23.06	6.17	1.01	1.53	0.018	1.67355	0.005752	0.15	51.1	208.1	0.32	14.5
original asphalt	1300	0	0	0	0	3.66	59.29	9.06	2.48	1.2	15.04	0.004	0.00432137	0.001033	0.22	62.33	159.1	0.35	9.1
agar and PA	750	0	0	0	0	3.78	41.1	17.07	4.52	1.29	3.53	1.5456	3.24353	0.007495	0.10344770047864131	33.1	256	0.82	11.12072168851341
gelatin	800	0	0	0	0	3.5	42.75	23.3	6.66	1.01	5.16	1.05	2.91291	0.034088	0.08	22.4	138.6	0.5255277787158252	11.407832923632638
microcrystalline cellulose	900	0	0	0	6.784217905745528	3.94	20.7	10.9	2.77	2.9	2.08	0.201	2.5867	0.003915	0.13	69.48	200.9	0.44	7.49
microcrystalline cellulose	1200	0	0	0	6.39800324426342	3.93	23.8	12.1	3.08	2.5	6.84	0.084	1.6902	0.004429	0.17	72.78	200.9	0.36	7.15
microcrystalline cellulose	1400	0	0	0	5.901953457978174	3.86	21.9	17.3	4.48	2.2	2.71	0.023	1.53275	0.001886	0.23	84.32	268.4	0.3	7.8
corn stalk	1400	0	0	0	5.765901943538861	3.85	82.98	16.88	4.38	1.76	4.44	0.0207	1.27038	0.000236	0.26	85.9	240.6	0.19	7.76
longan kernel	1300	0	0	0	0	4	13	3.5	0.88	1.97	2.03	0.031	1.78533	2.95e-05	0.09	84	304.2	0.32	5.51
longan kernel	1300	0	0	0	0	3.9	13.5	3.8	0.97	1.82	2.09	0.015	1.47129	3.6e-05	0.15	82	306.3	0.35	6.16
lignin and epoxy resin	1400	0	0	0	6.086498680140217	3.95	56.94	19.54	4.95	1.23	16.15	0.06	1.17319	0.007144	0.34	72	250.3	0.27	9.4
lignin and epoxy resin	1400	0	0	0	5.556505896114675	3.92	58.79	22.23	5.67	1.19	0.23	0.0004	0.812913	0.008411	0.37	82	275.5	0.22	9.19
lignin and epoxy resin	1400	0	0	0	5.977447552295061	3.85	55.1	20.88	5.42	1.03	4.46	0.016	1.14301	0.0103	0.37	75	246.8	0.27	9.29
lignin and epoxy resin	1000	0	0	0	6.76912425847699	4.07	50.55	17.05	4.19	1.04	9.15	0.06	1.4183	0.009044	0.25	67	183.5	0.44	9.54
lignin and epoxy resin	1200	0	0	0	5.950742331404832	3.84	52.55	19.29	5.19	1.08	2.71	0.009	1.13988	0.0081	0.32	75	224.6	0.25	9.22
lignin and epoxy resin	1600	0	0	0	5.448892338220844	3.76	70.04	22.62	6.02	1.34	3.15	0.006	0.851258	0.013333	0.43	81	255.1	0.29	9.28
polystyrene	800	0	0	0	0	3.8	51.89	16.03	4.22	2.67	4.54	0.008	0.845098	0.0381	0.16	70.2	257.1	0.28	9.55
polystyrene	800	0	0	0	4.963124911584854	3.62	47.92	24.05	6.64	2.53	5.3	0.003	0.30103	0.02785	0.13	58.3	211.7	0.37	9.57
polystyrene	800	0	0	0.8270171316705603	6.747508351162091	3.83	54.58	20.6	5.38	2.79	2.29	0.255	2.64836	0.055175	0.1	46	133.5	0.44	9.35
phenolic resin	600	0	0	3.2588451954379085	6.848810198831197	3.72	19.3	10.2	2.74	1.42	5.54	0.35	2.40261	0.0176	0.33	16.9	147.3	0.36	11.708265403666472
phenolic resin	600	0	0	3.388819540156083	6.548338802546656	3.72	20.4	10.8	2.9	1.19	7.07	0.16	1.95665	0.009148	0.78	20.8	147.3	0.32	11.542763622326465
phenolic resin	600	0	0	2.0990273068460326	6.145205223258215	3.72	20.6	11	2.96	1.12	5.89	0.1	1.83187	0.005724	0.32	61.3	261.1	0.23	10.265265148886558
phenolic resin	600	0	0	2.0871724984427464	6.32153677389864	3.72	21.4	11	2.96	1.02	3.79	0.08	1.92634	0.004268	0.32	56	232.1	0.21	10.53581520841405
sucrose	1000	0	0	0	6.062914100351614	3.93	61.36	18.26	4.65	2.09	1.92	0.158	2.5172	1.96e-05	0.03	65.3	175.4	0.3	14.66
sucrose	1000	0	0	0	6.530948264083234	3.89	60.12	17.54	4.51	2.03	2.21	0.264	2.67979	4.63e-05	0.06	55.6	142.4	0.34	14.41
sucrose	1000	0	0	0	4.924620097623096	3.64	74.03	23.2	6.37	2.01	7.22	0.024	1.12385	3.87e-05	0.06	70.2	279.6	0.35	13.55
lignin	1300	0	0	0	5.72822567366317	3.94	46.8	8.6	2.18	1.26	7.88	0.017	0.926342	0.004338	0.08	59.6	291.7	0.2	11.34
lignin	1300	0	0	0	6.5308208168204605	3.99	45.7	8.5	2.13	1.35	4.24	0.124	2.06882	0.005257	0.09	59.5	253.5	0.29	11.39
lignin	1300	0	0	0	6.2733970710357205	4.06	47.4	8.8	2.17	1.37	2.96	0.137	2.26816	0.003183	0.09	66.6	306.7	0.12	11.68
lignin	1300	0	0	0	5.130521556925766	3.9	42.7	9.5	2.44	1.25	1.82	0.007	0.260071	0.004107	0.06	66.2	299.2	0.15	11.67
long-flame coal	1300	0	0	0.6884390327177901	6.309034246364516	3.7	38.8	10.2	2.76	1.69	4.84	0.06	1.69548	3.5e-05	0.16	69	216.6	0.27	9.26
long-flame coal	1400	0	0	0.8392253867097739	5.925562849822398	3.65	41.2	10.8	2.96	1.55	5.85	0.03	1.31175	2.4e-05	0.21	74	217.6	0.28	9.21
long-flame coal	1500	0	0	0.7777525702707049	5.890970381041229	3.6	41.8	11.7	3.25	1.5	5.13	0.04	1.49415	3.9e-05	0.19	79	231.7	0.24	9.27
long-flame coal	1600	0	0	0.7359971796290612	5.918773973624023	3.58	45.8	11.8	3.3	1.46	6.45	0.03	1.26951	6.3e-05	0.14	76	202.4	0.28	9.31
Biomass	1300	0	0	0	6.3469087658583465	3.89	39.5	7.3	1.88	1.19	2.98	0.053	1.84819	0.002308	0.15	76.9	256.5	0.15	9.74
Biomass	1300	0	0	0	6.207220817261986	3.8	41.8	8.3	2.18	1.28	3.33	0.046	1.74036	0.002126	0.12	77.2	282.1	0.15	10.090038942534099
Biomass	1300	0	0	0	5.819316768345587	3.72	44.2	9.1	2.45	0.98	3.71	0.011	1.07555	0.00207	0.11	80.4	284.7	0.15	9.21
Biomass	1300	0	0	0	5.748353934780603	3.58	47.5	8.4	2.35	0.9	7.99	0.019	0.986772	0.002302	0.16	77.7	270.6	0.17	9.901884985189517
sucrose	1400	0	0	0.631751856971507	6.296256643189403	4.17	79.71	20.75	4.98	1.19	2.67	0.043	1.80482	0.001431	0.34	58.1	229.8	0.24	12.18
sucrose	1400	0	0	0.6185054367363638	6.3021409636672	4.14	87.25	20.91	5.05	1.19	2.4	0.04	1.82086	0.001103	0.42	62.8	255.8	0.24	10.459879832120548
sucrose	1400	0	0	0.44234767276963405	5.548830433515528	4.1	75.47	19.92	4.86	1.16	4.01	0.007	0.832509	0.001051	0.36	66	259.4	0.24	12.2
sucrose	1400	0	0	0.32073652764673	5.585540972688418	4.09	97.82	20.25	4.95	1.14	5.2	0.007	0.748188	0.001408	0.54	67.5	268.2	0.24	10.28294043236253
